1 **A porcine ex vivo lung perfusion model to investigate bacterial pathogenesis**

2 Amy Dumigan<sup>1</sup>, Marianne Fitzgerald<sup>1</sup>, Joana Sá Pessoa Graca Santos<sup>1</sup>, Umar Hamid<sup>1</sup>, Cecilia

3 M. O’Kane<sup>1</sup>, Danny F. McAuley<sup>1</sup>, Jose A. Bengoechea<sup>1\*</sup>

4 <sup>1</sup>Wellcome-Wolfson Institute for Experimental Medicine. School of Medicine, Dentistry and

5 Biomedical Sciences, Queen's University Belfast, 97 Lisburn Road, Belfast

6 \* Corresponding author: [j.bengoechea@qub.ac.uk](mailto:j.bengoechea@qub.ac.uk)

7

8

9 Running title: Lung perfusion model to assess *Klebsiella* virulence

10

11

12

13

14

15

16

17

18

19

20

21

22

23

24

25

26

27

28

29

30

31

32

33

34

35

36

37

38

39

40

41

42

43

44 **ABSTRACT**

45 The use of animal infection models is essential to understand microbial pathogenesis and to  
46 develop and test treatments. Insects, and 2D and 3D tissue models are increasingly being used  
47 as surrogate for mammalian models. However, there are concerns whether these models  
48 recapitulate the complexity of host-pathogen interactions. Here, we developed the *ex vivo*  
49 lung perfusion (EVLP) model of infection using porcine lungs to investigate *Klebsiella*  
50 *pneumoniae*-triggered pneumonia as model of respiratory infections. The porcine EVLP  
51 model recapitulates features of *K. pneumoniae*-induced pneumonia lung injury. This model is  
52 also useful to assess the pathogenic potential of *K. pneumoniae* as we observed that the  
53 attenuated *Klebsiella* capsule mutant strain caused less pathological tissue damage with a  
54 concomitant decrease in the bacterial burden compare to lungs infected with the wild type.  
55 The porcine EVLP model allows assessment of inflammatory responses following infection;  
56 similar to the mouse pneumonia model, we observed an increase of *il-10* in the lungs infected  
57 with the wild type and an increase of *ifn- $\gamma$*  in lungs infected with the capsule mutant. This  
58 model also allows monitoring phenotypes at the single-cell level. Wild-type *K. pneumoniae*  
59 skews macrophages towards an M2-like state. In vitro experiments probing pig bone marrow-  
60 derived macrophages uncovered the role of the M2 transcriptional factor STAT6, and that  
61 *Klebsiella*-induced *il10* expression is controlled by p38 and ERK. *Klebsiella*-induced  
62 macrophage polarization is dependent on the capsule. Altogether, this study support the  
63 utility of the EVLP model using pig lungs as platform to investigate the infection biology of  
64 respiratory pathogens.

65 **IMPORTANCE**

66 The implementation of infection models that approximate human disease is essential to  
67 understand infections and for testing new therapies before they enter into clinical stages.  
68 Rodents are used in most of pre-clinical studies, although the differences between mouse and

69 man have fuelled the conclusion that murine studies are unreliable predictors of human  
70 outcomes. Here, we have developed a whole lung porcine model of infection using the  
71 established *ex vivo* lung perfusion (EVLP) system established to re-condition human lungs  
72 for transplant. As a proof-of-principle, we provide evidence demonstrating that infection of  
73 the porcine EVLP with the human pathogen *K. pneumoniae* recapitulates the known features  
74 of *Klebsiella*-triggered pneumonia. Moreover, our data revealed the porcine EVLP model is  
75 useful to reveal features of the virulence of *K. pneumoniae* including the manipulation of  
76 immune cells. Altogether, this study supports the utility of the EVLP model using pig lungs  
77 as surrogate host for assessing respiratory infections.

## 78 **INTRODUCTION**

79 The use of animal infection models is essential to determine basic physiological principles,  
80 disease pathogenicity, identify virulence factors and to develop and test treatment strategies  
81 (1). The vast majority of immunology studies employ murine models, owing to availability of  
82 transgenic knockouts, reagents and established protocols. Therefore our current knowledge of  
83 the murine immune system far exceeds that of any other species. However, murine models  
84 have several limitations: there are significant differences between mice and humans in  
85 immune system development, activation, and response to challenge (2). Indeed mice share  
86 <10% genetic homology with human immune system (3). The increasing costs related to  
87 animal husbandry making large scale infection experiments expensive; and growing social  
88 concerns on the use of mice for biomedical experimentation despite the extensive and  
89 comprehensive animal welfare regulations in place, are additional drawbacks.

90 To circumvent these issues, alternative models of infection are being explored. Insects,  
91 including *Drosophila melanogaster* and *Galleria mellonella* (4), and the fish *Danio rerio* (5)  
92 are increasingly been used to investigate host-pathogen interactions. These models have  
93 proved successful in identifying virulence factors and to model features of the interaction  
94 between pathogens and the innate immune system. However, there are still concerns whether  
95 these infection models recapitulate the complex interactions between several immune cells,  
96 cytokines and chemokines and other soluble factors such as complement, and pathogens.

97 To address these issues, new infection models have been developed including 2D polarized  
98 epithelium, and 3D organoids of different tissues. These models still fall short of

99 recapitulating the complex interactions between different cells as well as the structure of the  
100 organ. This study was initiated to establish a new infection model to investigate respiratory  
101 infections, the *ex vivo* lung perfusion (EVLV) model of infection using porcine lungs. Next to  
102 non-human primates, the domestic pig (*Sus scrofa domesticus*) has the closest genome and  
103 protein sequences compared to humans (6). Like humans, pigs are omnivores, share similar  
104 anatomy and physiology and have adaptive and innate immune systems. Indeed, the porcine  
105 immune system is functionally more similar to the human immune system than that of mice,  
106 sharing >80% genetic homology (6). Notably, it is believed that experiments in pigs have  
107 more predictive therapeutic value than research carried out in rodents (7). The model  
108 developed herein facilitates the investigation of pathogen infection biology in a whole  
109 porcine lung receiving ventilation and perfusion in real time. This allows the investigation of  
110 the spatial distribution of infection, innate immune cell recruitment and activation, as well as  
111 histopathological changes. As a proof-of-concept, we have investigated whether this model  
112 recapitulates key features of *Klebsiella pneumoniae*-induced pneumonia.

113 *K. pneumoniae* is an important cause of nosocomial and community-acquired pneumonia.  
114 *Klebsiella* can readily spread between hospital patients with devastating results in  
115 immunocompromised individuals with mortality rates between 25-60% depending on the  
116 underlying condition (8). *K. pneumoniae* has been singled out by the World Health  
117 Organization as an urgent threat to human health due to the increasing isolation of multidrug  
118 resistant strains. A wealth of evidence obtained using the pneumonia mouse model  
119 demonstrates that clearance of *K. pneumoniae* relies on the activation of an inflammatory  
120 response which includes the activation of type I interferon (IFN)-controlled host defence  
121 responses (9, 10). Several studies have demonstrated the importance of alveolar macrophages  
122 and inflammatory monocytes in the containment and clearance of *K. pneumoniae* in the lungs  
123 (11-14). Conversely, this may suggest that a signature of *K. pneumoniae* infection biology is  
124 the attenuation of inflammatory responses and the subversion of macrophage-governed  
125 antimicrobial functions. Indeed, we and others have shown that, in sharp contrast to wild-type  
126 strains, attenuated mutant *Klebsiella* strains activate an inflammatory program, ultimately  
127 favouring their clearance (15-18). Furthermore, we have recently demonstrated that *K.*  
128 *pneumoniae* is able to survive intracellularly in mouse and human macrophages by  
129 preventing the fusion of lysosomes with the *Klebsiella* containing vacuoles (19).

130 Here, we report that the porcine EVLV infection model recapitulates key features of  
131 *Klebsiella*-triggered pneumonia. We present data showing that this model is also useful to

132 assess the pathogenic potential of *K. pneumoniae* as we observed that the attenuated  
133 *Klebsiella* capsule mutant strain caused less pathological damage to the tissue with a  
134 concomitant decrease in the bacterial burden compare to lung infected with the wild-type  
135 strain. Finally, we present evidence demonstrating that *K. pneumoniae* skews macrophage  
136 polarization following infection in a STAT6 dependant manner.

## 137 **RESULTS**

### 138 ***Ex vivo* lung porcine model of infection**

139 Herein we have developed a whole lung porcine model of infection using the established  
140 EVLP model developed to re-condition human lungs that were marginal at meeting the lung  
141 retrieval criteria with the view to increase the lung donor pool for transplant (20). In this  
142 work, we have used one of the four commercially available clinical grade devices for EVLP,  
143 the Vivoline® LS1 system. We selected a livestock porcine breed as they are readily  
144 available and been shown to best mimic animal variation reflective of human populations  
145 compared with wild breeds (7).

146 There are a number of essential details to consider when setting the porcine EVLP model.  
147 The quality of the organ is an essential factor, and researchers should carefully assess  
148 whether there are any macroscopic signs of damage/infection. The model uses 200 mL of  
149 autologous whole blood, which acts as a reservoir for immune cell recruitment and should be  
150 taken prior to lung retrieval. Lungs are removed from the pig and flushed with media through  
151 the pulmonary artery to remove blood. This is essential to avoid clotting. Lungs were then  
152 transferred to a sterile plastic bag on ice for transportation to the laboratory.

153 Unlike humans, pigs have an additional bronchus emerging from the trachea supplying the  
154 cranial lobe of the right lung (21). Therefore only left lungs were used in this investigation as  
155 they are immediately suitable for use on the LS1 system. However, preliminary  
156 experimentation revealed that by occluding the second bronchus on the right lung with a  
157 purse string suture, right lungs can also be used. A cannula is placed in the pulmonary artery  
158 and secured with surgical suture. An LS1 endobronchial tube is placed in the main bronchus  
159 and also secured with suture. To avoid inducing tissue damage and abnormal inflammatory  
160 responses the lungs should be warmed before any other manipulation, and the pulmonary  
161 perfusate and ventilation carefully managed in a gradual way. The lung is then connected to  
162 the LS1 system with perfusion but no ventilation and allowed to warm, ensure shunt is open  
163 at this time, once lung has reached 37°C, lung is inflated by hand using a bag-valve positive  
164 pressure ventilator assist device (Ambu-bag). The lung is then connected to a ventilator and

165 receives 10 cm of continuous positive airway pressure (CPAP) with a mix of 95% oxygen  
166 with 5% CO<sub>2</sub> (Figure 1A). A detailed description of the preparation of the lungs and set-up  
167 of the EVLP model is provided in the *Material and Methods* section. A schematic of a typical  
168 experimental design can be seen in Figure 1B.

169 Preliminary experiments were carried to optimise the inoculum of *K. pneumoniae* 52.145  
170 (hereafter Kp52145) and the time of infection based on macroscopic changes to the lungs.  
171 This *K. pneumoniae* strain clusters with those strains frequently associated with human  
172 infection and encodes all virulence functions significantly associated with invasive  
173 community-acquired disease in humans (22, 23). The virulence of this strain has been tested  
174 in several infection models including mice, rats, *G. mellonella*, and *Dyctiostlium discoideium*  
175 (24-27). An inoculum of 5 x 10<sup>5</sup> CFU and 4 h infection period was selected in this study  
176 based on assessing macroscopic damage of lungs during infection, Once lung had been  
177 warmed to 37 °C, a catheter was inserted into the caudal lobe of the lung and a baseline  
178 bronchoalveolar lavage (BAL) carried out. With catheter still in place, lungs received 5 mL  
179 of sterile PBS or inoculated with the bacterial inoculum. After 4 h of infection, a second BAL  
180 sample was collected and assessed for immune cell recruitment and protein levels. At the  
181 experimental endpoint, tissue samples were collected from the cranial, middle and caudal  
182 areas of the lung (Figure 1C) and analysed for oedema, bacterial colony forming units (CFU)  
183 and histology. Single samples were taken from the caudal lobe to assess immune cell  
184 recruitment (using flow cytometry) and gene transcription via real-time-qPCR (RT-qPCR).

185 **Tissue damage in the porcine EVLP model reflects hallmarks of *Klebsiella*-induced**  
186 **human pathology.**

187 Infection of porcine lungs with Kp52145 led to macroscopic damage after 4 h in stark  
188 contrast to PBS mock-infected lungs (Figure 2A). *K. pneumoniae* capsule polysaccharide  
189 (CPS) is a well-characterized virulence factor of *Klebsiella* (28, 29). *cps* mutant strains are  
190 avirulent in mammalian and non-mammalian models of disease (24, 25, 28, 29). To  
191 determine the sensitivity of the porcine model, lungs were infected with 5 x 10<sup>5</sup> CFU in 5 mL  
192 PBS of strain Kp52145- $\Delta wca_{K2}$  As shown in Figure 2A, infection with the *cps* mutant  
193 resulted in limited macroscopic damage, suggesting that the *cps* also plays a crucial role in  
194 infection biology of *K. pneumoniae* in the porcine EVLP infection model.

195 To establish whether the macroscopic damage in the lungs infected with the wild-type strain  
196 was associated with higher bacterial burden in the tissue, samples were collected across the  
197 lung, as shown in Figure 1C, homogenized and the number of CFUs per gram of tissue

198 determined. Indeed, the bacterial burden was three logs higher in lungs infected with the  
199 wild-type strain than in those infected with the *cps* mutant. Interestingly, despite inoculum  
200 being introduced in the caudal lobe, bacterial burden was homogeneously distributed across  
201 the lung (Figure 2B).

202 Histological analysis of porcine tissues was carried out based on parameters of acute  
203 respiratory distress syndrome (ARDS) in animal models as defined by the American Thoracic  
204 Society. Pathogenic hallmarks of lung injury include: thickening of alveolar septa and  
205 infiltration of proteinaceous debris, red blood cells (haemorrhage) and immune cells  
206 including neutrophils into the alveolar space (neutrophilic alveolitis) (30). Analysis of lung  
207 stained sections with hematoxylin-eosine revealed signs of injury in lungs infected, although  
208 injury was more severe in those lungs infected with Kp52145 (Figure 3A). This was further  
209 confirmed by analysis of alveolar septal thickness (Figure 3B). This measurement revealed  
210 significant thickening of alveolar septal membranes in lungs infected with Kp52145.  
211 Interestingly, infection with the *cps* mutant strain induced significantly enhanced alveolar  
212 septal thickening compared to PBS controls, however this damage was significantly reduced  
213 when compared to Kp52145-infected lungs (Figure 3B). One hallmark of *K. pneumoniae*-  
214 triggered necrotising pneumonia is the presence of cherry red (blood streaked) sputum, i.e.  
215 haemorrhage. Haemorrhage is clearly evident both macroscopically (Figure 2A) and  
216 microscopically (Figure 3A) in lungs infected with Kp52145, and significantly reduced in the  
217 lungs infected with the *cps* mutant. The presence of intra-alveolar haemorrhage was assigned  
218 a score of 0, 1, 2 or 3 based on a semi-quantitative assessment of none, mild, moderate or  
219 severe. Scoring confirmed significantly enhanced haemorrhage in lungs infected with  
220 Kp52145 compared to the lungs PBS-mock infected and infected with the *cps* mutant (Figure  
221 3C). Haemorrhage was accompanied by presence of inflammatory immune cells within the  
222 alveolar space. The number of nucleated cells in the alveolar space was quantified, and it was  
223 significantly higher in the lungs infected with Kp52145 than in those infected with the *cps*  
224 mutant or PBS-mock infected (Figure 3D). The presence of proteinaceous debris was  
225 significantly higher in the infected lungs compare to those PBS-mock infected. However,  
226 proteinaceous debris was significantly higher in lungs infected with Kp52145 than in those  
227 infected with the *cps* mutant (Figure 3E).

228 Further supporting that infection with Kp52145 was associated with an increase in lung  
229 injury, thirty five-fold increase in the total levels of BAL protein was found in the lungs  
230 infected with the wild-type strain. There were no differences in the total BAL protein  
231 between lungs infected with the *cps* mutant and PBS-mock infected (Figure 3F). These



232 findings suggest that infection with the wild-type strain affected alveolar epithelial-  
233 endothelial barrier function.

234 Collectively, these findings demonstrate that the porcine EVLP model recapitulates features  
235 of *K. pneumoniae*-induced pneumonia lung injury. Furthermore, our results demonstrate that  
236 this model is useful to assess the virulence of *K. pneumoniae* since the *cps* mutant, known to  
237 be attenuated in other infection models (24, 25, 28, 29), was also attenuated in the porcine  
238 EVLP model.

### 239 **Innate Immune cell recruitment in *K. pneumoniae* EVLP model.**

240 We next sought to investigate innate immune response to *K. pneumoniae* infection in the  
241 porcine EVLP model. 100 µg of tissue were removed from caudal lobe and homogenised.  
242 Red blood cells were removed from BAL and tissue samples using ammonium-chloride-  
243 potassium lysis buffer. Samples were then stained for innate immune cells using purified anti-  
244 pig antibodies conjugated with fluorophores and analysed by flow cytometry. CD11R3 has a  
245 similar expression pattern to the human CD11b marker, being expressed on pig monocytes  
246 and alveolar macrophages, but not on lymphocytes, erythrocytes or platelets (31, 32) and was  
247 used to assess macrophages. Porcine CD172a, a marker of dendritic cells (33), and a porcine  
248 specific granulocyte marker clone 6D10 (Bio-Rad) to identify neutrophils were also used (31,  
249 32). Lungs infected with Kp52145 showed an increase in the number of macrophages in  
250 tissue (Figure 4A). Macrophages are presented as percentage single CD11R3+ cells (gating  
251 strategy and representative dot plots supplied in Supplementary Figure 2A). Neutrophils were  
252 identified using a porcine granulocyte marker (clone 6D10) in a similar fashion  
253 (Supplementary Figure 2B) and were shown to be increased in density in 4 h BAL in  
254 Kp52145 infected experimental group (Figure 4B). No significant change was observed in  
255 CD11R3-CD172+ dendritic cells (Figure 4C) (gating strategy described in Supplementary  
256 Figure 2C). The number of macrophages and neutrophils in the tissue and BAL from lungs  
257 infected with the *cps* mutant were lower than those found in the wild-type-infected lungs and  
258 closer to the number found in PBS-mock infected lungs (Figure 4B). Enhanced macrophage  
259 and neutrophil recruitment in Kp52145 infected BAL samples and lung tissue respectively  
260 correlates with injury observed in histological analysis (Figure 3A-EF).

261 The presence of bacteria in tissues is associated with macrophage reprogramming (34). M1  
262 (classical) polarization is associated with protection during acute infections, whereas M2  
263 (alternative) programme is linked to the resolution of inflammation and tissue regeneration  
264 (34). Therefore, we sought to establish whether *K. pneumoniae* infection could be linked to a



265 macrophage switch in polarization. To investigate this possibility, we assessed the levels of  
266 the known M2 macrophage marker CD163, an iron scavenger receptor, in infected  
267 macrophages (35). Infections were carried out with bacteria expressing GFP to assess CD163  
268 levels in cells with and without associated bacteria. Flow cytometry experiments showed that  
269 the levels of CD163 were significantly higher in those macrophages associated with Kp52145  
270 (CD11R3+GFP+CD163+) than in those without bacteria (CD11R3+GFP-CD163+) (Figure  
271 4D) (gating strategy can be found in Supplementary Figure 2D). Interestingly, when  
272 infections were done with the *cps* mutant, the levels of CD163 were significantly lower in  
273 macrophages associated with the mutant than in those associated with the wild-type strain.  
274 (Figure 4D and E), suggesting that the CPS may contribute to expression of CD163 on  
275 macrophages in *K. pneumoniae*-infected lungs.

#### 276 ***K. pneumoniae*-induced inflammation in the porcine EVLP model.**

277 To further investigate the host response to *K. pneumoniae* in the porcine EVLP model, we  
278 analysed the expression of several inflammation-associated cytokines and chemokines by  
279 RT-qPCR from samples collected from the caudal lobe of lungs. Higher levels of *il-6* and *il-*  
280 *12* were detected in the lungs infected with Kp52145 than in those infected with the *cps*  
281 mutant or PBS-mock infected (Figure 5A and B). In contrast, the levels of *il-8*, and *ifn-*  
282  $\gamma$  were significantly higher in the lungs infected with the *cps* mutant than in those infected  
283 with Kp52145 (Figure 5C and D). Mice deficient in IFN- $\gamma$  production suffer greater mortality  
284 from *K. pneumoniae* infection (36-39). The higher levels of IFN $\gamma$  that are produced during  
285 *cps* mutant infection in the EVLP model are likely a result of the high rate of clearance of the  
286 capsule mutant strain.

287 The expression levels of *nos2* and *stat4* were also significantly higher in the lungs infected  
288 with the *cps* mutant than in those infected with the wild-type strain which were similar to  
289 those lungs PBS-mock infected (Figure 5 E and F). These markers have been associated with  
290 M1 polarized macrophages (35). We observed a significant increase in the levels of the anti-  
291 inflammatory cytokine *il-10* only in the lungs infected with Kp52145 (Figure 5G). Similar  
292 observation has been reported previously in the mouse pneumonia model (40, 41). Notably,  
293 enhanced production of *il-10* is one of the features of M2 polarized macrophages which are  
294 associated with resolution of inflammation (34, 35, 42).

295 Collectively, these findings demonstrate that the porcine EVLP model is useful to assess  
296 inflammatory responses following infection. By assessing *Klebsiella*-induced responses, our

297 results infer that wild-type *K. pneumoniae* may modulate macrophage polarization towards  
298 M2 state.

299 ***K. pneumoniae* drives macrophage polarisation in a STAT6-dependent manner.**

300 To further investigate whether *K. pneumoniae* governs macrophage polarization, we  
301 established a method to generate porcine bone marrow-derived macrophages (pBMDMs). We  
302 next sought to determine whether *K. pneumoniae* skews the polarization of pBMDMs.  
303 Infection of pBMDMs with Kp52145 resulted in a significant upregulation of the surface  
304 expression of the M2 marker CD163 as detected by flow cytometry (Figure 6A). This  
305 finding is in perfect agreement with the results obtained infecting the porcine EVLP model.  
306 STAT6 is a well-established transcription factor regulating M2 macrophage polarization (43,  
307 44). Therefore, we sought to determine whether *K. pneumoniae* activates STAT6 to govern  
308 macrophage polarization in pBMDMs. Immunoblotting experiments revealed that Kp52145  
309 induced the phosphorylation of STAT6 in pBMDMs (Figure 6B). Phosphorylation of STAT6  
310 is essential for its nuclear translocation to control the transcription of STAT6-induced genes  
311 (45, 46). To establish whether *Klebsiella*-induced macrophage polarization is STAT6-  
312 dependent, we followed a pharmacologic approach probing the STAT6 inhibitor AS1517499  
313 (47). Transcriptional analysis showed that *Klebsiella*-induced expression of the M2 markers,  
314 *cd163* and *arginase-1* was ablated in cells pre-treated with the STAT6 inhibitor (Figure 6C  
315 and D), demonstrating that *Klebsiella* induction of M2 markers is STAT6 dependent.  
316 Interestingly, and in agreement with our previous findings suggesting that the CPS could be  
317 required for *Klebsiella*-triggered macrophage polarization, the *cps* mutant did not induce the  
318 phosphorylation of STAT6 (Figure 6E). As we anticipated, the *cps* mutant did not induce the  
319 expression of the M2 markers *arg-1* and *cd163* in pBMDMs (Figure 6F and G). Furthermore,  
320 the *cps* mutant induced the expression of the M1 markers *stat4* and *nos2* (Supplementary  
321 Figure 3).

322 Kp52145 also upregulated the transcription of the anti-inflammatory cytokine and M2 marker  
323 *il-10* in pBMDM (Figure 7A), indicating the *il-10* expression observed in porcine EVLP  
324 tissues infected with Kp52145 (Figure 5G) could be derived from macrophages. This  
325 increased expression was not dependent on STAT6 because the STAT6 inhibitor did not  
326 reduce the expression of *il-10* (Figure 7A). In mouse and human macrophages, the  
327 transcription of *il-10* is regulated by STAT3 (48). Immunoblotting analysis confirmed the  
328 activation of STAT3 in *Klebsiella*-infected pBMDMs (Figure 7B). MAP kinases p38 and  
329 ERK are known to control the expression of IL10 in mouse and human macrophages (48).

330 Control experiments showed that Kp52145 infection induced the phosphorylation of p38 and  
331 ERK MAP kinases in pBMDMs (Figure 7C). As we anticipated, pharmacologic inhibition of  
332 p38 and ERK with SB203580 and U0126, respectively, resulted in decrease in the expression  
333 of *il-10* in infected pBMDMs (Figure 7D).

334 Altogether, these results demonstrate that *K. pneumoniae* skews macrophage polarization  
335 towards a M2-state in an STAT6-dependent manner. Furthermore, our results indicate that  
336 *Klebsiella*-induced macrophage polarization is dependent on the CPS.

337

## 338 **DISCUSSION**

339 The development of infection models that approximate human disease is essential not only  
340 for understanding pathogenesis at the molecular level, but also to test new therapies before  
341 entering into clinical stages. This is particularly relevant given the costs of clinical trials, and  
342 the impact on the health system. Animal models, chiefly rodents, have provided invaluable  
343 information and, not surprisingly, they are used in most of the pre-clinical studies. However,  
344 the limitations of these models in terms of yielding accurate pre-clinical data to inform  
345 clinical trials is widely recognized. Furthermore, in the context of infectious diseases it is an  
346 established fact the significant differences between rodents, mice, and humans in terms of  
347 immune activation following infection (2). In fact, the different immune/inflammatory  
348 pathways existing between mouse and man have fuelled the conclusion that murine studies  
349 are unreliable predictors of human outcomes. In this regard, porcine models are becoming  
350 increasingly important as ideal preclinical models. The anatomical and physiological  
351 similarities between pigs and humans, including the activation of the immune system, argue  
352 in favour of using pigs to model human diseases.

353 The results of this study strongly suggest that the EVLP model using pig lungs could be  
354 considered a platform to investigate the infection biology of respiratory pathogens and,  
355 eventually, to run pre-clinical studies testing new therapeutics. As a proof-of-principle, we  
356 provide evidence demonstrating that infection of the porcine EVLP with the human pathogen  
357 *K. pneumoniae* recapitulates the known features of *Klebsiella*-triggered pneumonia including  
358 the lung injury associated with the infection and the recruitment of neutrophils and other  
359 immune cells following infection. Moreover, our data revealed the EVLP model is useful to  
360 assess the virulence potential of *K. pneumoniae*. The *K. pneumoniae cps* mutant previously  
361 known to be attenuated in the mouse pneumonia model was also attenuated in the porcine  
362 EVLP model.

363 To set-up the EVLP infection model using pig lungs we took advantage of the advances in  
364 organ preparation for lung transplants. The EVLP method has become prevalent in lung  
365 transplant centres around the world (20), and has been proven as a mean to prolong the  
366 window for transplant evaluation (49). The lung transplant community has developed a  
367 robust protocol for EVLP that can capture key physiologic parameters (gas exchange, lung  
368 mechanics, pulmonary vascular hemodynamics, and oedema) and to obtain samples for  
369 limited analysis (20). In our study we have adapted the EVLP technology used for human  
370 lungs to pig lungs, and we have developed a robust infection method to assess the infection  
371 biology of respiratory pathogens. Although in this study we have focused on *K. pneumoniae*,  
372 the model is amenable to use with other bacterial pathogens, but also viruses and fungi.

373 *Ex vivo* modelling is superior to tissue- and cell-based assays because the architectural  
374 integrity of the lung is preserved. For example, type I pneumocytes, which cover over 90% of  
375 the gas exchange surface of the lung, are difficult to culture *in vitro*; therefore, little is known  
376 about the response of this cell type to injury and infection. Our model is a significant step  
377 change from the previous elegant infection model using *ex vivo* sections of pig lungs to  
378 assess bacterial virulence (50). This cell-free model allows to investigate pathogen  
379 physiology in a spatially structured environment. However, the porcine EVLP model  
380 developed here facilitates the study of the functional interactions between different immune  
381 cells, dendritic cells, neutrophils macrophages, and epithelial cells in a more physiological  
382 setting. The main advantage of using pig versus human lungs is the availability of the former.  
383 There is scarce number of human lungs not suitable for transplant, and the access to them is  
384 expensive. Nonetheless, several studies have proven that the EVLP model using human lungs  
385 is suitable to test disease-modifying therapies in acute lung injury to generate relevant,  
386 reliable and predictable human pharmacodynamic, pharmacokinetic and toxicology data  
387 through analysis at the organ (51). Recently, we have successfully adapted the EVLP model  
388 using human lungs to study *Klebsiella* infection biology.

389 Another novel finding of our study is that *Klebsiella* skews macrophage polarization to an  
390 M2-like state. Importantly, our findings uncovered that *Klebsiella*-induced macrophage  
391 polarization is dependent on the activation of STAT6, the most important transcriptional  
392 factor governing M2 polarization (43, 44). M1 phenotype is characterized by the expression  
393 of high levels of proinflammatory cytokines, high production of reactive oxygen  
394 intermediates and iNOS-dependent reactive nitrogen intermediates, promotion of Th1  
395 response by IL12 production, and potent microbicidal activity (35, 42). In contrast, M2  
396 macrophages are characterized by the selective expression of markers such as arginase 1

397 (Arg1), CD163 as well as the production of low levels of IL-12, iNOS, and enhanced IL-10  
398 production (35, 42). M1 macrophages are generally considered responsible for resistance  
399 against intracellular pathogens (34). Not surprisingly, a growing number of studies show that  
400 some pathogens have evolved different strategies to interfere with M1 polarization (34)  
401 whereas there are few examples of intracellular pathogens (*Francisella*, *Salmonella*, *Coxiella*,  
402 *Tropheryma*) inducing an anti-inflammatory M2 state (52-55). The potential impact of  
403 *Klebsiella* on macrophage plasticity has been largely overlooked. Most likely this is due to  
404 the fact that *Klebsiella* has been traditionally considered an extracellular pathogen, although  
405 our laboratory has recently demonstrated that *Klebsiella* survives intracellular in mouse and  
406 human macrophages by preventing phagolysosome fusion (19). The facts that the attenuated  
407 *cps* mutant did not activate STAT6, and did not induce an M2-like state strongly suggest that  
408 the induction of an M2-like state is a virulence strategy of *Klebsiella* to promote infection.  
409 We and others have provided compelling evidence showing that *K. pneumoniae* CPS is a  
410 bona fide immune evasin (15, 18, 25, 56-59). The results of this study further reinforce this  
411 notion by demonstrating that the CPS skews macrophage polarizations towards an M2 state.  
412 Further studies are warranted to investigate whether this could be a general feature of other  
413 CPS.

414 Interestingly, our findings provide an explanation for the clinical observation that some  
415 health factors such as alcohol abuse or viral infections are associated with increased  
416 susceptibility to *Klebsiella* infections (60-62). These factors are known to increase the  
417 number of M2 macrophages in the lung (63-65) which then could facilitate *Klebsiella*  
418 infection. Supporting this hypothesis, there is an improvement in bacterial clearance when  
419 this macrophage population is eliminated *in vivo* (63-65).

420 Despite the clear utility of the EVLP model to assess infections, it is worthwhile commenting  
421 on the limitations. The process recapitulated in the EVLP model represent early steps in the  
422 infection process and do not model other aspects such as organ dissemination. In addition, the  
423 model does not integrate other signals, such as those from the gut, known to be relevant to  
424 control infections (66-68). Further impediments are the difficulties to generate cell specific  
425 knock-in or knock-outs and the relative low-throughput of the model to test several bacterial  
426 mutants. However, we believe that the advantages significantly outweighs the limitations, and  
427 the EVLP model is a useful translational pre-clinical model to illuminate new aspects of the  
428 infection biology of pathogens such as those identified in this work.

429

## 430 **MATERIAL AND METHODS**

### 431 *Collection of lungs and whole blood*

432 Immediately after euthanization, 200 mL of whole blood was collected rapidly in sterile  
433 receptacles containing 10% citrate phosphate dextrose solution (C7165, SIGMA), an  
434 anticoagulant, whole blood was then mixed gently and kept at room temperature. Both lungs  
435 and heart were promptly removed by sharp dissection. The heart was removed leaving ample  
436 (>3 cm) section of pulmonary artery intact. Lungs were then separated along the carina again  
437 leaving at least 3cm of trachea intact. As pigs have an additional bronchus (cranial) on the  
438 right lung, only left lungs were selected for this study as they are readily compatible with the  
439 LS1 system and are anatomically more similar to human lungs (Judge *et al.*, 2014). The left  
440 lung was then flushed gradually with 500 mL Dulbecco's Modified Eagle Medium (DMEM)  
441 without phenol red via pulmonary artery to remove blood using a 50 mL syringe. Tissue was  
442 then wrapped in plastic and placed on ice for transportation to the lab. Lungs were rejected  
443 for this study if they contained large areas of haemorrhage or consolidation.

### 444 *Preparation of lungs for EVLP*

445 A cannula was placed in pulmonary artery and connected to the efferent tube of the VivoLine  
446 LS1 reconditioning unit to facilitate perfusion. Similarly, an endobronchial tube was inserted  
447 into the bronchus and secured with suture before being connected to a ventilator circuit with  
448 adult bacterial viral filters (140141/1, DS Medical). The LS1 temperature probe was placed in  
449 pulmonary veins and secured in place using a surgical suture. "Perfusate" consisting of 2 L  
450 of DMEM (Invitrogen) without phenol red and supplemented with 5% L-glutamine and 5%  
451 fetal calf serum (FCS), was placed in the base of the reservoir. Target temperature was set to  
452 37°C. Initial perfusion began with 0.05 L/min, at this point ensuring that the LS1 shunt is  
453 open, and flow gas gradually increased to 0.4 L/min maintaining a pulmonary artery pressure  
454 of 10 - 15 mmHg. Once a temperature of 30°C was reached, the lungs were gently inflated  
455 with an Ambu bag. Ensuring lung is warm prior to inflation reduces risk of capillary damage.  
456 Continuous positive airway pressure (CPAP) of 10 cm H<sub>2</sub>O was applied with 95% O<sub>2</sub>/5% CO<sub>2</sub>  
457 using a mechanical ventilator (Dräger Evita). Once system reaches 36°C with desired  
458 pressure, 200 mL of autologous blood were added to the perfusate to act as a reservoir for  
459 immune cell recruitment.

### 460 *Bronchoalveolar lavage (BAL)*

461 Once a temperature of 36°C was reached, a baseline broncho-alveolar lavage (BAL) sample  
462 was collected by inserting a catheter (PE 240-Harvard apparatus) into the sub-segment  
463 (caudal) lobe via the endotracheal tube and gently advanced until resistance was encountered,



464 at which point the catheter was withdrawn by 1 cm. Then 125 mL of warmed normal saline  
465 was instilled and retrieved after 5 minutes through the same catheter. The catheter was then  
466 used to deliver 5 mL of sterile PBS or  $5 \times 10^5$  CFU Kp52145 in 5 mL of PBS. After 4 h BAL  
467 sampling was repeated prior to disconnecting the lung and tissue collection carried out. BAL  
468 samples were assessed for total protein and innate immune infiltrates.

#### 469 ***Bacterial preparation.***

470 *K. pneumoniae* 52.145, a clinical isolate (serotype O1:K2) previously described (22, 69) was  
471 utilised alongside the isogenic *cps* mutant, strain 52145- $\Delta wca_{K2}$ , which has been previously  
472 described (70). Bacteria were tagged with GFP by transformation with plasmid pFPV25.1Cm  
473 (25). For infections, a single colony was cultured in 5 mL of LB broth overnight at 36°C with  
474 gentle agitation. After 1:10 dilution, bacteria were grown to exponential phase by incubation  
475 at 37°C with agitation for 2.5 h. Bacteria were then adjusted OD<sub>600</sub> at 1.0 in PBS. For *in vitro*  
476 infections, macrophages were infected with a M.O.I of 100:1, whereas  $5 \times 10^5$  CFU/mL were  
477 used to infect the lungs. CFUs in the tissue were determined by homogenising 100 µg of  
478 tissue from caudal lobe in 1 mL sterile PBS and plating serial dilutions on *Salmonella-*  
479 *Shigella* -agar plates (SIGMA). Three samples were assessed across each lung. Plates were  
480 incubated overnight at 37°C before counting. When required, antibiotics were added to the  
481 growth medium at the following concentration: rifampicin, 50 µg/ml; chloramphenicol 25  
482 µg/ml.

#### 483 ***Protein quantification***

484 Protein concentration was assessed in BAL samples at baseline (0 h) and at 4 h. Standards  
485 and samples were incubated with Pierce 660 nm protein assay (150 µl of reagent: 10 µl of  
486 sample/standard) at room temperature for 5 min prior to quantification using the Nanodrop  
487 spectrophotometer as per manufacturer instructions (Thermo scientific).

#### 488 ***Histology***

489 Tissue sections (~1 cm<sup>3</sup>) were collected from the cranial, middle and caudal lobes of each  
490 lung fixed placed in 10% formalin x 10 volume of tissue sample in a 15 mL Falcon tube with  
491 an inverted p1000 tip to submerge tissue. After a minimum of 48 h at room temperature,  
492 samples were then processed for paraffin embedding, sectioning and haematoxylin and eosin  
493 staining. Samples were imaged using the DM5500 Leica vertical microscope at x 200  
494 magnification. Alveolar septal oedema was quantified by measuring alveolar septal thickness  
495 with ImageJ software, whereby three measurements of thickest septa were acquired per  
496 image and averaged, 30 images were acquired whereby 10 images were acquired per section



497 and 3 sections per lung.. Alveolar septa adjacent to blood vessel or airway were excluded due  
498 to normal thickening resulting from collagen deposition. Intra-alveolar hemorrhage, presence  
499 of intra-alveolar mononuclear cells and proteinaceous debris were also recorded. Histological  
500 scores were assigned based on parameters set by Matute-Bello and co-workers (30). Whereby  
501 hemorrhage was scored as follows 0= none, 1= mild, 2= moderate and 3= severe.  
502 Proteinaceous debris scored as 0 = none, 1 = protein present and 2= abundant presence of  
503 protein in alveolar spaces. The number of nucleated cells within the alveolar space were  
504 counted and presented as intra-alveolar leukocytes. 5 images were scored per section with 3  
505 sections per lung at x 400 magnification.

### 506 ***RNA purification***

507 100 µg of lung tissue was homogenised using a VDI 12 tissue homogeniser (VWR) in 1 mL  
508 of TRizol reagent (Ambion) and incubated at room temperature for 5 min before storing at -  
509 80 °C. RNA was extracted from pBMDMs using RNeasy<sup>®</sup> Minikit (QIAGEN ref: 74104).  
510 Total RNA was extracted according to manufacturer's instructions. 5 µg of total RNA were  
511 treated with recombinant DNase I (Roche Diagnostics Ltd.) at 37°C for 30 min and then  
512 purified using a standard phenol–chloroform method. The RNA was precipitated with 20 µl 3  
513 M sodium acetate (pH 5.2) and 600 µl 98% (v/v) ethanol at -20°C, washed twice in 75% (v/v)  
514 ethanol, dried and then resuspended in RNase-free H<sub>2</sub>O. Duplicate cDNA preparations from  
515 each sample were generated from 1 µg of RNA using Moloney murine leukaemia virus (M-  
516 MLV) reverse transcriptase (Sigma-Aldrich) according to the manufacturer's instructions.  
517 RT-qPCR analysis of cytokine related porcine gene expression was performed using the  
518 KAPA SYBR-FAST qPCR Kit (KAPA Biosystems), using the primers shown in Table 1.  
519 Samples were run using the Stratagene Mx3005P qPCR System (Agilent Technologies).  
520 Non-template negative controls to check for primer-dimer and a porcine genomic DNA were  
521 included. Thermal cycling conditions were as follows: 95°C for 3 min for enzyme activation,  
522 40 cycles of denaturation at 95°C for 10 s and annealing at 60°C for 20 s. cDNA samples  
523 were tested in duplicate and relative mRNA quantity was determined by the comparative  
524 threshold cycle ( $\Delta\Delta C_t$ ) method using HPRT housekeeping gene for normalisation.

### 525 ***Flow cytometry***

526 100 µg of lung tissue was homogenised in 1 mL sterile PBS and filtered through a 70 µm cell  
527 strainer (2236348 Fisherbrand). Cells were centrifuged and red cells lysed using ammonium-  
528 chloride-potassium lysis buffer (A1049201, Gibco) for 3 min at room temperature, washed  
529 with 1 mL PBS prior to staining with the following mouse anti-pig antibodies: CD11R3

530 (MCA2309), CD163 (clone 2A10), , SLA Class II and Granulocyte antibody (clone 6D10)  
531 (AbD Serotech). Each purified anti-pig antibody was labelled with a fluorophore using  
532 Abcam conjugation kits PE (ab102918), APC-Cy5.5 (ab102855), FITC (ab102884), and  
533 Rhodamine (ab188286)

#### 534 ***Generation of porcine bone marrow-derived macrophages (pBMDMs)***

535 Femurs from pigs between 80-100 kg were cleared of all muscle and sinew. Bone was then  
536 washed with 70 % ethanol. A sterilised junior hacksaw was used to cut transversely across  
537 bone to expose bone marrow under sterile conditions. 5 g of bone marrow per 50 mL tube  
538 were suspended in 40 mL complete media and centrifuged at 600 x g for 8 min to remove fat.  
539 Red cells were lysed via incubations with ammonium-chloride-potassium lysis buffer  
540 (A1049201, Gibco) for 3 min. Cells were washed in 10 mL complete media and passed  
541 through a 70 mm cell strainer (2236348 Fisherbrand) prior to centrifugation. Cell pellet was  
542 dislodged before plating on 20 cm petri dishes (SARSTEDT) in 25 mL complete medium  
543 (DMEM, high glucose, GlutaMAX™, supplemented with 10% FCS, 1% pen/strep) and 5 mL  
544 of syringe filtered L929 supernatant (a source of M-CSF). Cells were cultured for 6 days  
545 before assessment of purity by flow cytometry.

#### 546 ***In vitro infections***

547 pBMDMs were seeded in 6 well dishes ( $5 \times 10^5$  cells/well) in complete media (DMEM, high  
548 glucose, GlutaMAX™, supplemented with 10% FCS and 1% pen/strep) and allowed to  
549 adhere overnight. Complete media was removed and replaced with antibiotic free media prior  
550 to infection. Bacterial inoculum was prepared as previously indicated and cells were infected  
551 with a M.O.I of 100 bacteria per cell. To synchronise infection, plates were centrifuged at  
552  $200 \times g$  for 5 min. After 1 h, media was removed, replaced with antibiotic free media  
553 supplemented with 100 µg/ml gentamicin (SIGMA) to kill extracellular bacteria. For STAT6  
554 inhibition, cells were serum starved and incubated with the chemical STAT6 inhibitor AS  
555 1517499 (50 nM, 919486-40-1, AXON Medchem) or DMSO as vehicle control for 2 h prior  
556 to infection and maintained throughout. To inhibit pERK and p38 activity, the chemical  
557 inhibitors U0126 (20 µg/mL, LC laboratories,) and SB203580 (10 µg/mL, Tocris,) were  
558 utilised respectively 2 h prior to infection and maintained throughout experiment. At  
559 indicated time points, supernatants were removed and cells lysed for analysis by western  
560 blotting or qRT-PCR.

#### 561 ***Western blotting***

562 At appropriate time point post-infection, cells were washed with ice-cold PBS before lysis in  
563 Laemmli buffer (4% SDS, 10% 2-mercaptoethanol, 20% glycerol, 0.004% bromophenol  
564 blue, 0.125 M Tris-HCl pH 6.8). Lysates were sonicated for 10 sec at 10% amplitude, boiled  
565 at 95 °C for 5 minutes and centrifuged at 12,000g for 1 min prior to running on 8% SDS-  
566 PAGE. Samples were transferred onto 0.2 mm nitrocellulose membrane (Biotrace, VWR)  
567 using a semi-dry transfer unit (Bio-Rad) before blocking nonspecific antibody binding for 1 h  
568 in 3% BSA in TBS with 1 % Tween-20. Primary antibodies included: phospho-STAT6  
569 (Tyr641) (1:2000, #9361), total STAT6 (1:1000, BioRad #170-6516), phospho-STAT3  
570 (Y705) (1:2000, #9145), total STAT3 (1:2000, #12640), phospho-ERK (p44/42) (1:2000;  
571 #91015), phospho-p38 (T180/Y182) (1:2000, #4511), all from Cell Signalling Technologies.  
572 Total STAT6 (21HCLC) (1:1000, Thermo Scientific, #701110). Blots were incubated with  
573 appropriate horseradish peroxidase -conjugated secondary antibody goat anti-rabbit  
574 immunoglobulins (1:5000, BioRad 170-6515) or goat anti-mouse immunoglobulins (1:1000,  
575 BioRad 170-6516). Protein bands were detected using chemiluminescence reagents and a  
576 G:BOX Chemi XRQ chemiluminescence imager (Syngene). To detect multiple proteins,  
577 membranes were reprobbed after stripping of previously used antibodies using a pH 2.2  
578 glycine-HCl/SDS buffer. To ensure that equal amounts of proteins were loaded, blots were  
579 reprobbed with  $\alpha$ -tubulin (1:2000, Cell Signalling Technologies #2125).

#### 580 *Statistics.*

581 Statistical analyses were performed with Prism 6 (GraphPad Software) using 1-way ANOVA  
582 with Bonferroni correction or unpaired two-tailed Student's t-test. Error bars indicate  
583 standard error of mean (SEM) Statistical significance is indicated as follows: ns (not  
584 significant),  $P > 0.05$ , \*,  $P < 0.05$ ; \*\*,  $P < 0.01$ ; \*\*\*,  $P < 0.001$ .

585

#### 586 **ACKNOWLEDGEMENTS**

587 We thank the members of the J.A.B. laboratory for their thoughtful discussions and support  
588 with this project. This work was supported by Marie Curie Career Integration Grant U-KARE  
589 (PCIG13-GA-2013-618162); Biotechnology and Biological Sciences Research Council  
590 (BBSRC, BB/P006078/1), Medical Research Council (MR/R005893/1) and Queen's  
591 University Belfast start-up funds to J.A.B.

592

#### 593 **AUTHORS CONTRIBUTIONS**

594 AD, DFM, CMO and JAB conceived the study and wrote the first draft of the manuscript.  
595 AD, JS-P, MF, UH performed the experiments and contributed data for this work. AD, MF,  
596 UH, JS-P, DFM, CMO, and JAB contributed to and approved the final version of the  
597 manuscript.

598

## 599 **CONFLICT OF INTEREST**

600 The authors declare that they have no conflict of interest.

601

## 602 **REFERENCES**

- 603 1. Greek R, Menache A. 2013. Systematic reviews of animal models: methodology versus  
604 epistemology. *Int J Med Sci* 10:206-221.
- 605 2. Mizgerd JP, Skerrett SJ. 2008. Animal models of human pneumonia. *Am J Physiol Lung*  
606 *Cell Mol Physiol* 294:L387-98.
- 607 3. Mouse Genome Sequencing Consortium, Waterston RH, Lindblad-Toh K, Birney E,  
608 Rogers J, Abril JF, Agarwal P, Agarwala R, Ainscough R, Alexandersson M, An P,  
609 Antonarakis SE, Attwood J, Baertsch R, Bailey J, Barlow K, Beck S, Berry E, Birren B,  
610 Bloom T, Bork P, Botcherby M, Bray N, Brent MR, Brown DG, Brown SD, Bult C, Burton  
611 J, Butler J, Campbell RD, Carninci P, Cawley S, Chiaromonte F, Chinwalla AT, Church DM,  
612 Clamp M, Clee C, Collins FS, Cook LL, Copley RR, Coulson A, Couronne O, Cuff J,  
613 Curwen V, Cutts T, Daly M, David R, Davies J, Delehaunty KD, Deri J, Dermitzakis ET,  
614 Dewey C, Dickens NJ, Diekhans M, Dodge S, Dubchak I, Dunn DM, Eddy SR, Elnitski L,  
615 Emes RD, Eswara P, Eyraas E, Felsenfeld A, Fewell GA, Flicek P, Foley K, Frankel WN,  
616 Fulton LA, Fulton RS, Furey TS, Gage D, Gibbs RA, Glusman G, Gnerre S, Goldman N,  
617 Goodstadt L, Grafham D, Graves TA, Green ED, Gregory S, Guigo R, Guyer M, Hardison  
618 RC, Haussler D, Hayashizaki Y, Hillier LW, Hinrichs A, Hlavina W, Holzer T, Hsu F, Hua  
619 A, Hubbard T, Hunt A, Jackson I, Jaffe DB, Johnson LS, Jones M, Jones TA, Joy A, Kamal  
620 M, Karlsson EK, Karolchik D, Kasprzyk A, Kawai J, Keibler E, Kells C, Kent WJ, Kirby A,  
621 Kolbe DL, Korf I, Kucherlapati RS, Kulbokas EJ, Kulp D, Landers T, Leger JP, Leonard S,  
622 Letunic I, Levine R, Li J, Li M, Lloyd C, Lucas S, Ma B, Maglott DR, Mardis ER, Matthews  
623 L, Mauceli E, Mayer JH, McCarthy M, McCombie WR, McLaren S, McLay K, McPherson  
624 JD, Meldrim J, Meredith B, Mesirov JP, Miller W, Miner TL, Mongin E, Montgomery KT,  
625 Morgan M, Mott R, Mullikin JC, Muzny DM, Nash WE, Nelson JO, Nhan MN, Nicol R,  
626 Ning Z, Nusbaum C, O'Connor MJ, Okazaki Y, Oliver K, Overton-Larty E, Pachter L, Parra  
627 G, Pepin KH, Peterson J, Pevzner P, Plumb R, Pohl CS, Poliakov A, Ponce TC, Ponting CP,  
628 Potter S, Quail M, Reymond A, Roe BA, Roskin KM, Rubin EM, Rust AG, Santos R,  
629 Sapojnikov V, Schultz B, Schultz J, Schwartz MS, Schwartz S, Scott C, Seaman S, Searle S,  
630 Sharpe T, Sheridan A, Shownkeen R, Sims S, Singer JB, Slater G, Smit A, Smith DR,  
631 Spencer B, Stabenau A, Stange-Thomann N, Sugnet C, Suyama M, Tesler G, Thompson J,  
632 Torrents D, Trevaskis E, Tromp J, Ucla C, Ureta-Vidal A, Vinson JP, Von Niederhausern  
633 AC, Wade CM, Wall M, Weber RJ, Weiss RB, Wendl MC, West AP, Wetterstrand K,  
634 Wheeler R, Whelan S, Wierzbowski J, Willey D, Williams S, Wilson RK, Winter E, Worley  
635 KC, Wyman D, Yang S, Yang SP, Zdobnov EM, Zody MC, Lander ES. 2002. Initial  
636 sequencing and comparative analysis of the mouse genome. *Nature* 420:520-562.
- 637 4. Glavis-Bloom J, Muhammed M, Mylonakis E. 2012. Of model hosts and man: using  
638 *Caenorhabditis elegans*, *Drosophila melanogaster* and *Galleria mellonella* as model hosts for  
639 infectious disease research. *Adv Exp Med Biol* 710:11-17.

- 640 5. Torraca V, Mostowy S. 2018. Zebrafish Infection: From Pathogenesis to Cell Biology.  
641 Trends Cell Biol 28:143-156.
- 642 6. Groenen MA, Archibald AL, Uenishi H, Tuggle CK, Takeuchi Y, Rothschild MF, Rogel-  
643 Gaillard C, Park C, Milan D, Megens HJ, Li S, Larkin DM, Kim H, Frantz LA, Caccamo M,  
644 Ahn H, Aken BL, Anselmo A, Anthon C, Auvil L, Badaoui B, Beattie CW, Bendixen C,  
645 Berman D, Blecha F, Blomberg J, Bolund L, Bosse M, Botti S, Bujie Z, Bystrom M,  
646 Capitanu B, Carvalho-Silva D, Chardon P, Chen C, Cheng R, Choi SH, Chow W, Clark RC,  
647 Clee C, Crooijmans RP, Dawson HD, Dehais P, De Sapio F, Dibbits B, Drou N, Du ZQ,  
648 Eversole K, Fadista J, Fairley S, Faraut T, Faulkner GJ, Fowler KE, Fredholm M, Fritz E,  
649 Gilbert JG, Giuffra E, Gorodkin J, Griffin DK, Harrow JL, Hayward A, Howe K, Hu ZL,  
650 Humphray SJ, Hunt T, Hornshoj H, Jeon JT, Jern P, Jones M, Jurka J, Kanamori H,  
651 Kapetanovic R, Kim J, Kim JH, Kim KW, Kim TH, Larson G, Lee K, Lee KT, Leggett R,  
652 Lewin HA, Li Y, Liu W, Loveland JE, Lu Y, Lunney JK, Ma J, Madsen O, Mann K,  
653 Matthews L, McLaren S, Morozumi T, Murtaugh MP, Narayan J, Nguyen DT, Ni P, Oh SJ,  
654 Onteru S, Panitz F, Park EW, Park HS, Pascal G, Paudel Y, Perez-Enciso M, Ramirez-  
655 Gonzalez R, Reecy JM, Rodriguez-Zas S, Rohrer GA, Rund L, Sang Y, Schachtschneider K,  
656 Schraiber JG, Schwartz J, Scobie L, Scott C, Searle S, Servin B, Southey BR, Sperber G,  
657 Stadler P, Sweedler JV, Tafer H, Thomsen B, Wali R, Wang J, Wang J, White S, Xu X, Yerle  
658 M, Zhang G, Zhang J, Zhang J, Zhao S, Rogers J, Churcher C, Schook LB. 2012. Analyses of  
659 pig genomes provide insight into porcine demography and evolution. Nature 491:393-398.
- 660 7. Aigner B, Renner S, Kessler B, Klymiuk N, Kurome M, Wunsch A, Wolf E. 2010.  
661 Transgenic pigs as models for translational biomedical research. J Mol Med (Berl) 88:653-  
662 664.
- 663 8. Munoz-Price LS, Poirel L, Bonomo RA, Schwaber MJ, Daikos GL, Cormican M,  
664 Cornaglia G, Garau J, Gniadkowski M, Hayden MK, Kumarasamy K, Livermore DM, Maya  
665 JJ, Nordmann P, Patel JB, Paterson DL, Pitout J, Villegas MV, Wang H, Woodford N, Quinn  
666 JP. 2013. Clinical epidemiology of the global expansion of *Klebsiella pneumoniae*  
667 carbapenemases. Lancet Infect Dis 13:785-796.
- 668 9. Bengoechea JA, Sa Pessoa J. 2019. *Klebsiella pneumoniae* infection biology: living to  
669 counteract host defences. FEMS Microbiol Rev 43:123-144.
- 670 10. Ivin M, Dumigan A, de Vasconcelos FN, Ebner F, Borroni M, Kavirayani A,  
671 Przybyszewska KN, Ingram RJ, Lienenklaus S, Kalinke U, Stoiber D, Bengoechea JA,  
672 Kovarik P. 2017. Natural killer cell-intrinsic type I IFN signaling controls *Klebsiella*  
673 *pneumoniae* growth during lung infection. PLoS Pathog 13:e1006696.
- 674 11. Xiong H, Keith JW, Samilo DW, Carter RA, Leiner IM, Pamer EG. 2016. Innate  
675 Lymphocyte/Ly6C(hi) Monocyte Crosstalk Promotes *Klebsiella pneumoniae* Clearance. Cell  
676 165:679-689.
- 677 12. Xiong H, Carter RA, Leiner IM, Tang YW, Chen L, Kreiswirth BN, Pamer EG. 2015.  
678 Distinct Contributions of Neutrophils and CCR2+ Monocytes to Pulmonary Clearance of  
679 Different *Klebsiella pneumoniae* Strains. Infect Immun 83:3418-3427.
- 680 13. Broug-Holub E, Toews GB, van Iwaarden JF, Strieter RM, Kunkel SL, Paine R, 3rd,  
681 Standiford TJ. 1997. Alveolar macrophages are required for protective pulmonary defenses in  
682 murine *Klebsiella pneumoniae*: elimination of alveolar macrophages increases neutrophil  
683 recruitment but decreases bacterial clearance and survival. Infect Immun 65:1139-1146.
- 684 14. Cheung DO, Halsey K, Speert DP. 2000. Role of pulmonary alveolar macrophages in  
685 defense of the lung against *Pseudomonas aeruginosa*. Infect Immun 68:4585-4592.
- 686 15. Tomas A, Lery L, Rigueiro V, Perez-Gutierrez C, Martinez V, Moranta D, Llobet E,  
687 Gonzalez-Nicolau M, Insua JL, Tomas JM, Sansonetti PJ, Tournebize R, Bengoechea JA.  
688 2015. Functional Genomic Screen Identifies *Klebsiella pneumoniae* Factors Implicated in  
689 Blocking Nuclear Factor kappaB (NF-kappaB) Signaling. J Biol Chem 290:16678-16697.



- 690 16. March C, Moranta D, Regueiro V, Llobet E, Tomas A, Garmendia J, Bengoechea JA.  
691 2011. *Klebsiella pneumoniae* outer membrane protein A is required to prevent the activation  
692 of airway epithelial cells. *J Biol Chem* 286:9956-9967.
- 693 17. Llobet E, Martinez-Moliner V, Moranta D, Dahlstrom KM, Regueiro V, Tomas A, Cano  
694 V, Perez-Gutierrez C, Frank CG, Fernandez-Carrasco H, Insua JL, Salminen TA, Garmendia  
695 J, Bengoechea JA. 2015. Deciphering tissue-induced *Klebsiella pneumoniae* lipid A structure.  
696 *Proc Natl Acad Sci U S A* 112:E6369-78.
- 697 18. Lawlor MS, Handley SA, Miller VL. 2006. Comparison of the host responses to wild-  
698 type and *cpsB* mutant *Klebsiella pneumoniae* infections. *Infect Immun* 74:5402-5407.
- 699 19. Cano V, March C, Insua JL, Aguilo N, Llobet E, Moranta D, Regueiro V, Brennan GP,  
700 Millan-Lou MI, Martin C, Garmendia J, Bengoechea JA. 2015. *Klebsiella pneumoniae*  
701 survives within macrophages by avoiding delivery to lysosomes. *Cell Microbiol* 17:1537-  
702 1560.
- 703 20. Tane S, Noda K, Shigemura N. 2017. Ex Vivo Lung Perfusion: A Key Tool for  
704 Translational Science in the Lungs. *Chest* 151:1220-1228.
- 705 21. Judge EP, Hughes JM, Egan JJ, Maguire M, Molloy EL, O'Dea S. 2014. Anatomy and  
706 bronchoscopy of the porcine lung. A model for translational respiratory medicine. *Am J*  
707 *Respir Cell Mol Biol* 51:334-343.
- 708 22. Lery LM, Frangeul L, Tomas A, Passet V, Almeida AS, Bialek-Davenet S, Barbe V,  
709 Bengoechea JA, Sansonetti P, Brisse S, Tournebize R. 2014. Comparative analysis of  
710 *Klebsiella pneumoniae* genomes identifies a phospholipase D family protein as a novel  
711 virulence factor. *BMC Biol* 12:41-7007-12-41.
- 712 23. Holt KE, Wertheim H, Zadoks RN, Baker S, Whitehouse CA, Dance D, Jenney A,  
713 Connor TR, Hsu LY, Severin J, Brisse S, Cao H, Wilksch J, Gorrie C, Schultz MB, Edwards  
714 DJ, Nguyen KV, Nguyen TV, Dao TT, Mensink M, Minh VL, Nhu NT, Schultz C,  
715 Kuntaman K, Newton PN, Moore CE, Strugnell RA, Thomson NR. 2015. Genomic analysis  
716 of diversity, population structure, virulence, and antimicrobial resistance in *Klebsiella*  
717 *pneumoniae*, an urgent threat to public health. *Proc Natl Acad Sci U S A* 112:E3574-81.
- 718 24. Insua JL, Llobet E, Moranta D, Perez-Gutierrez C, Tomas A, Garmendia J, Bengoechea  
719 JA. 2013. Modeling *Klebsiella pneumoniae* pathogenesis by infection of the wax moth  
720 *Galleria mellonella*. *Infect Immun* 81:3552-3565.
- 721 25. March C, Cano V, Moranta D, Llobet E, Perez-Gutierrez C, Tomas JM, Suarez T,  
722 Garmendia J, Bengoechea JA. 2013. Role of bacterial surface structures on the interaction of  
723 *Klebsiella pneumoniae* with phagocytes. *PLoS One* 8:e56847.
- 724 26. Tournebize R, Doan BT, Dillies MA, Maurin S, Beloeil JC, Sansonetti PJ. 2006.  
725 Magnetic resonance imaging of *Klebsiella pneumoniae*-induced pneumonia in mice. *Cell*  
726 *Microbiol* 8:33-43.
- 727 27. Izquierdo L, Coderch N, Pique N, Bedini E, Corsaro MM, Merino S, Fresno S, Tomas  
728 JM, Regue M. 2003. The *Klebsiella pneumoniae wabG* gene: role in biosynthesis of the core  
729 lipopolysaccharide and virulence. *J Bacteriol* 185:7213-7221.
- 730 28. Cortes G, Borrell N, de Astorza B, Gomez C, Sauleda J, Alberti S. 2002. Molecular  
731 analysis of the contribution of the capsular polysaccharide and the lipopolysaccharide O side  
732 chain to the virulence of *Klebsiella pneumoniae* in a murine model of pneumonia. *Infect*  
733 *Immun* 70:2583-2590.
- 734 29. Lawlor MS, Hsu J, Rick PD, Miller VL. 2005. Identification of *Klebsiella pneumoniae*  
735 virulence determinants using an intranasal infection model. *Mol Microbiol* 58:1054-1073.
- 736 30. Matute-Bello G, Downey G, Moore BB, Groshong SD, Matthay MA, Slutsky AS,  
737 Kuebler WM, Acute Lung Injury in Animals Study Group. 2011. An official American  
738 Thoracic Society workshop report: features and measurements of experimental acute lung  
739 injury in animals. *Am J Respir Cell Mol Biol* 44:725-738.

- 740 31. Summerfield A, Haverson K, Thacker E, McCullough KC. 2001. Differentiation of  
741 porcine myeloid bone marrow haematopoietic cell populations. *Vet Immunol Immunopathol*  
742 80:121-129.
- 743 32. Thacker E, Summerfield A, McCullough K, Ezquerra A, Dominguez J, Alonso F, Lunney  
744 J, Sinkora J, Haverson K. 2001. Summary of workshop findings for porcine myelomonocytic  
745 markers. *Vet Immunol Immunopathol* 80:93-109.
- 746 33. Facci MR, Auray G, Buchanan R, van Kessel J, Thompson DR, Mackenzie-Dyck S,  
747 Babiuk LA, Gerds V. 2010. A comparison between isolated blood dendritic cells and  
748 monocyte-derived dendritic cells in pigs. *Immunology* 129:396-405.
- 749 34. Benoit M, Desnues B, Mege JL. 2008. Macrophage polarization in bacterial infections. *J*  
750 *Immunol* 181:3733-3739.
- 751 35. Xue J, Schmidt SV, Sander J, Draffehn A, Krebs W, Quester I, De Nardo D, Gohel TD,  
752 Emde M, Schmidleithner L, Ganesan H, Nino-Castro A, Mallmann MR, Labzin L, Theis H,  
753 Kraut M, Beyer M, Latz E, Freeman TC, Ulas T, Schultze JL. 2014. Transcriptome-based  
754 network analysis reveals a spectrum model of human macrophage activation. *Immunity*  
755 40:274-288.
- 756 36. Yoshida K, Matsumoto T, Tateda K, Uchida K, Tsujimoto S, Iwakurai Y, Yamaguchi K.  
757 2001. Protection against pulmonary infection with *Klebsiella pneumoniae* in mice by  
758 interferon-gamma through activation of phagocytic cells and stimulation of production of  
759 other cytokines. *J Med Microbiol* 50:959-964.
- 760 37. Moore TA, Perry ML, Getsoian AG, Newstead MW, Standiford TJ. 2002. Divergent role  
761 of gamma interferon in a murine model of pulmonary versus systemic *Klebsiella pneumoniae*  
762 infection. *Infect Immun* 70:6310-6318.
- 763 38. Zeng X, Moore TA, Newstead MW, Deng JC, Kunkel SL, Luster AD, Standiford TJ.  
764 2005. Interferon-inducible protein 10, but not monokine induced by gamma interferon,  
765 promotes protective type 1 immunity in murine *Klebsiella pneumoniae* pneumonia. *Infect*  
766 *Immun* 73:8226-8236.
- 767 39. Zeng X, Moore TA, Newstead MW, Deng JC, Lukacs NW, Standiford TJ. 2005. IP-10  
768 mediates selective mononuclear cell accumulation and activation in response to  
769 intrapulmonary transgenic expression and during adenovirus-induced pulmonary  
770 inflammation. *J Interferon Cytokine Res* 25:103-112.
- 771 40. Yoshida K, Matsumoto T, Tateda K, Uchida K, Tsujimoto S, Yamaguchi K. 2001.  
772 Induction of interleukin-10 and down-regulation of cytokine production by *Klebsiella*  
773 *pneumoniae* capsule in mice with pulmonary infection. *J Med Microbiol* 50:456-461.
- 774 41. Yoshida K, Matsumoto T, Tateda K, Uchida K, Tsujimoto S, Yamaguchi K. 2000. Role  
775 of bacterial capsule in local and systemic inflammatory responses of mice during pulmonary  
776 infection with *Klebsiella pneumoniae*. *J Med Microbiol* 49:1003-1010.
- 777 42. Murray PJ, Allen JE, Biswas SK, Fisher EA, Gilroy DW, Goerdt S, Gordon S, Hamilton  
778 JA, Ivashkiv LB, Lawrence T, Locati M, Mantovani A, Martinez FO, Mege JL, Mosser DM,  
779 Natoli G, Saeij JP, Schultze JL, Shirey KA, Sica A, Suttles J, Udalova I, van Ginderachter  
780 JA, Vogel SN, Wynn TA. 2014. Macrophage activation and polarization: nomenclature and  
781 experimental guidelines. *Immunity* 41:14-20.
- 782 43. Liao X, Sharma N, Kapadia F, Zhou G, Lu Y, Hong H, Paruchuri K, Mahabeleshwar GH,  
783 Dalmas E, Venteclef N, Flask CA, Kim J, Doreian BW, Lu KQ, Kaestner KH, Hamik A,  
784 Clement K, Jain MK. 2011. Kruppel-like factor 4 regulates macrophage polarization. *J Clin*  
785 *Invest* 121:2736-2749.
- 786 44. Biswas SK, Mantovani A. 2012. Orchestration of metabolism by macrophages. *Cell*  
787 *Metab* 15:432-437.



- 788 45. Mikita T, Campbell D, Wu P, Williamson K, Schindler U. 1996. Requirements for  
789 interleukin-4-induced gene expression and functional characterization of Stat6. *Mol Cell Biol*  
790 16:5811-5820.
- 791 46. Mikita T, Daniel C, Wu P, Schindler U. 1998. Mutational analysis of the STAT6 SH2  
792 domain. *J Biol Chem* 273:17634-17642.
- 793 47. Nagashima S, Yokota M, Nakai E, Kuromitsu S, Ohga K, Takeuchi M, Tsukamoto S,  
794 Ohta M. 2007. Synthesis and evaluation of 2-{{2-(4-hydroxyphenyl)-  
795 ethyl}amino}pyrimidine-5-carboxamide derivatives as novel STAT6 inhibitors. *Bioorg Med*  
796 *Chem* 15:1044-1055.
- 797 48. Saraiva M, O'Garra A. 2010. The regulation of IL-10 production by immune cells. *Nat*  
798 *Rev Immunol* 10:170-181.
- 799 49. Cypel M, Yeung JC, Liu M, Anraku M, Chen F, Karolak W, Sato M, Laratta J, Azad S,  
800 Madonik M, Chow CW, Chaparro C, Hutcheon M, Singer LG, Slutsky AS, Yasufuku K, de  
801 Perrot M, Pierre AF, Waddell TK, Keshavjee S. 2011. Normothermic ex vivo lung perfusion  
802 in clinical lung transplantation. *N Engl J Med* 364:1431-1440.
- 803 50. Harrison F, Muruli A,  
804 Higgins S, Diggle SP. 2014. Development of an ex vivo porcine lung model for studying  
805 growth, virulence, and signaling of *Pseudomonas aeruginosa*. *Infect Immun* 82:3312-3323.
- 806 51. Proudfoot AG, McAuley DF, Griffiths MJ, Hind M. 2011. Human models of acute lung  
807 injury. *Dis Model Mech* 4:145-153.
- 808 52. Benoit M, Barbarat B, Bernard A, Olive D, Mege JL. 2008. *Coxiella burnetii*, the agent of  
809 Q fever, stimulates an atypical M2 activation program in human macrophages. *Eur J*  
810 *Immunol* 38:1065-1070.
- 811 53. Desnues B, Lepidi H, Raoult D, Mege JL. 2005. Whipple disease: intestinal infiltrating  
812 cells exhibit a transcriptional pattern of M2/alternatively activated macrophages. *J Infect Dis*  
813 192:1642-1646.
- 814 54. Eisele NA, Ruby T, Jacobson A, Manzanillo PS, Cox JS, Lam L, Mukundan L, Chawla  
815 A, Monack DM. 2013. Salmonella require the fatty acid regulator PPARdelta for the  
816 establishment of a metabolic environment essential for long-term persistence. *Cell Host*  
817 *Microbe* 14:171-182.
- 818 55. Saliba AE, Li L, Westermann AJ, Appenzeller S, Stapels DA, Schulte LN, Helaine S,  
819 Vogel J. 2016. Single-cell RNA-seq ties macrophage polarization to growth rate of  
820 intracellular *Salmonella*. *Nat Microbiol* 2:16206.
- 821 56. Regueiro V, Campos MA, Pons J, Alberti S, Bengoechea JA. 2006. The uptake of a  
822 *Klebsiella pneumoniae* capsule polysaccharide mutant triggers an inflammatory response by  
823 human airway epithelial cells. *Microbiology* 152:555-566.
- 824 57. Campos MA, Vargas MA, Regueiro V, Llompарт CM, Alberti S, Bengoechea JA. 2004.  
825 Capsule polysaccharide mediates bacterial resistance to antimicrobial peptides. *Infect Immun*  
826 72:7107-7114. 10.1128/IAI.72.12.7107-7114.2004.
- 827 58. Moranta D, Regueiro V, March C, Llobet E, Margareto J, Larrarte E, Garmendia J,  
828 Bengoechea JA. 2010. *Klebsiella pneumoniae* capsule polysaccharide impedes the expression  
829 of beta-defensins by airway epithelial cells. *Infect Immun* 78:1135-1146.
- 830 59. Frank CG, Reguerio V, Rother M, Moranta D, Maeurer AP, Garmendia J, Meyer TF,  
831 Bengoechea JA. 2013. *Klebsiella pneumoniae* targets an EGF receptor-dependent pathway to  
832 subvert inflammation. *Cell Microbiol* 15:1212-1233.
- 833 60. Ballinger MN, Standiford TJ. 2010. Postinfluenza bacterial pneumonia: host defenses  
834 gone awry. *J Interferon Cytokine Res* 30:643-652.
- 835 61. Happel KI, Odden AR, Zhang P, Shellito JE, Bagby GJ, Nelson S. 2006. Acute alcohol  
836 intoxication suppresses the interleukin 23 response to *Klebsiella pneumoniae* infection.  
*Alcohol Clin Exp Res* 30:1200-1207.

- 837 62. Mancuso P, Gottschalk A, Phare SM, Peters-Golden M, Lukacs NW, Huffnagle GB.  
838 2002. Leptin-deficient mice exhibit impaired host defense in Gram-negative pneumonia. *J*  
839 *Immunol* 168:4018-4024.
- 840 63. Tsuchimoto Y, Asai A, Tsuda Y, Ito I, Nishiguchi T, Garcia MC, Suzuki S, Kobayashi  
841 M, Higuchi K, Suzuki F. 2015. M2b Monocytes Provoke Bacterial Pneumonia and Gut  
842 Bacteria-Associated Sepsis in Alcoholics. *J Immunol* 195:5169-5177.
- 843 64. Ohama H, Asai A, Ito I, Suzuki S, Kobayashi M, Higuchi K, Suzuki F. 2015. M2b  
844 macrophage elimination and improved resistance of mice with chronic alcohol consumption  
845 to opportunistic infections. *Am J Pathol* 185:420-431.
- 846 65. Dolgachev VA, Yu B, Reinke JM, Raghavendran K, Hemmila MR. 2012. Host  
847 susceptibility to gram-negative pneumonia after lung contusion. *J Trauma Acute Care Surg*  
848 72:614-22; discussion 622-3.
- 849 66. Fagundes CT, Amaral FA, Vieira AT, Soares AC, Pinho V, Nicoli JR, Vieira LQ,  
850 Teixeira MM, Souza DG. 2012. Transient TLR activation restores inflammatory response and  
851 ability to control pulmonary bacterial infection in germfree mice. *J Immunol* 188:1411-1420.
- 852 67. Brown RL, Sequeira RP, Clarke TB. 2017. The microbiota protects against respiratory  
853 infection via GM-CSF signaling. *Nat Commun* 8:1512-017-01803-x.
- 854 68. Clarke TB. 2014. Early innate immunity to bacterial infection in the lung is regulated  
855 systemically by the commensal microbiota via nod-like receptor ligands. *Infect Immun*  
856 82:4596-4606.
- 857 69. Nassif X, Sansonetti PJ. 1986. Correlation of the virulence of *Klebsiella pneumoniae* K1  
858 and K2 with the presence of a plasmid encoding aerobactin. *Infect Immun* 54:603-608.
- 859 70. Llobet E, Tomas JM, Bengochea JA. 2008. Capsule polysaccharide is a bacterial decoy  
860 for antimicrobial peptides. *Microbiology* 154:3877-3886.

861  
862  
863  
864  
865  
866  
867  
868  
869  
870  
871  
872  
873  
874  
875  
876  
877  
878  
879  
880  
881  
882  
883  
884  
885  
886

887  
888  
889  
890  
891  
892  
893  
894  
895  
896  
897  
898  
899

**Table 1. List of primers used in this study for RT-qPCR.**

| <b>Gene</b>       | <b>Primer sequence</b>                                                             |
|-------------------|------------------------------------------------------------------------------------|
| <i>il-6</i>       | (Forward) 5' GACAAAGCCACCACCCCTAA 3'<br>(Reverse) 5' CTCGTTCTGTGACTGCAGCTTATC 3'   |
| <i>il-12</i>      | (Forward) 5' CGTGCCTCGGGCAATTATA 3'<br>(Reverse) 5' CGCAGGTGAGGTCGCTAGTT 3'        |
| <i>il-8</i>       | (Forward) 5' ATGACTTCCAAACTGGCTG 3'<br>(Reverse) 5' CTTGTTGTTGTTACTGCTG 3'         |
| <i>ifn-γ</i>      | (Forward) 5'CTCTCCGAAACAATGAGTTATACAA 3'<br>(Reverse) 5' GCT CTC TGG CCT TGG AA 3' |
| <i>nos2</i>       | (Forward) 5' CCACCAGACGAGCTTCTACC 3'<br>(Reverse) 5' TCCTTTGTTACCGCTTCCAC 3'       |
| <i>stat-4</i>     | (Forward) 5' GAAAGCCACCTTGGAGGAAT 3'<br>(Reverse) 5' ACAACCGGCCTTTGTTGTAG 3'       |
| <i>il-10</i>      | (Forward) 5' GCC TTCGGCCCAGTGAA 3'<br>(Reverse) 5' AGAGACCCGGTCAGCAACAA3'          |
| <i>cd163</i>      | (Forward) 5' CCAGTGAGGGAAGTGGACAC 3'<br>(Reverse) 5' GGCTGCCTCCACCTTTAAGT 3'       |
| <i>arginase-1</i> | (Forward) 5' AGAAGAACGGAAGGACCAGC 3'<br>(Reverse) 5' CAGATAGGCAGGGAGTCAC 3'        |
| <i>hpri</i>       | (Forward) 5'ACACTGGCAAACAATGCAA3'<br>(Reverse) 5'ACACTTCGAGGGGTCCTTTT3'            |

900  
901  
902  
903  
904  
905  
906  
907

908  
909  
910  
911  
912  
913  
914  
915

## 916 **FIGURE LEGENDS**

### 917 **Figure 1: The porcine EVLP infection model.**

918 A. Images of lung during experimental process. Green arrow indicating LS1 ET tube in main  
919 bronchus and blue arrow indicating a catheter placed in pulmonary artery of left lung.

920 B. Schematic describing the experimental design.

### 921 **Figure 2: Infection of whole lungs with *K. pneumoniae* induces lung damage.**

922 A Images of macroscopic damage of the lungs before and after infection with *K. pneumoniae*  
923 52.145 (Kp52145) and the isogenic *cps* mutant, strain 52145- $\Delta wca_{K2}$ .

924 B. Bacterial load (CFU per gr of tissue) across different sections of the lungs infected with *K.*  
925 *pneumoniae* 52.145 (Kp52145) and the isogenic *cps* mutant, strain 52145- $\Delta wca_{K2}$ . Values are  
926 presented as the mean  $\pm$  SEM of three independent experiments.

### 927 **Figure 3: Porcine EVLP model recapitulates clinical hallmarks of *K. pneumoniae* 928 induced pneumonia.**

929 A. Haematoxylin and eosin staining of porcine lung samples (x 400 magnification) from  
930 lungs mock-infected (PBS), and infected with *K. pneumoniae* 52.145 (Kp52145) and the  
931 isogenic *cps* mutant, strain 52145- $\Delta wca_{K2}$ .

932 B. Alveolar septal thickness was measured using ImageJ software. Each dot represents an  
933 average of three alveolar thicknesses per image, corresponding to three sections per lung  
934 across three experimental replicates from lungs mock-infected (PBS), and infected with *K.*  
935 *pneumoniae* 52.145 (Kp52145) and the isogenic *cps* mutant, strain 52145- $\Delta wca_{K2}$  ( $\Delta wca_{K2}$ ).

936 C. Intra-alveolar haemorrhage was scored per image whereby 0, 1,2, and 3 represent none,  
937 mild, moderate and severe levels of red blood corpuscles within the alveolar space from lungs  
938 mock-infected (PBS), and infected with *K. pneumoniae* 52.145 (Kp52145) and the isogenic  
939 *cps* mutant, strain 52145- $\Delta wca_{K2}$  ( $\Delta wca_{K2}$ ).

940 D. Number of nucleated cells evident in the alveolar space per image from lungs mock-  
941 infected (PBS), and infected with *K. pneumoniae* 52.145 (Kp52145) and the isogenic *cps*  
942 mutant, strain 52145- $\Delta wca_{K2}$  ( $\Delta wca_{K2}$ ).

943 E. Scoring of proteinaceous debris in the alveolar space from lungs mock-infected (PBS), and  
944 infected with *K. pneumoniae* 52.145 (Kp52145) and the isogenic *cps* mutant, strain 52145-  
945  $\Delta wca_{K2}$  ( $\Delta wca_{K2}$ ).

946 F. Protein levels at baseline and endpoint BAL samples from whole lungs mock-infected  
947 (PBS), and infected with *K. pneumoniae* 52.145 (Kp52145) and the isogenic *cps* mutant,  
948 strain 52145- $\Delta wca_{K2}$  ( $\Delta wca_{K2}$ ).

949 Statistical analysis was carried out using one-way ANOVA, \*\*\*\*p<0.0001, \*\*\*P < 0.001;  
950 \*\*P < 0.01. Error bars are standard error of mean.

951 **Figure 4: Innate cells recruitment in *K. pneumoniae*-infected porcine EVLP model.**

952 A. % CD11R3<sup>+</sup> macrophages in baseline (0 h) and endpoint (4 h post treatment) in BAL  
953 samples and tissue from caudal lobe of mock-infected (PBS), and infected with *K.*  
954 *pneumoniae* 52.145 (Kp52145) and the isogenic *cps* mutant, strain 52145- $\Delta wca_{K2}$ .

955 B. % Granulocytes in baseline (0 h) and endpoint (4 h post treatment) in BAL samples and  
956 tissue from caudal lobe of mock-infected (PBS), and infected with *K. pneumoniae* 52.145  
957 (Kp52145) and the isogenic *cps* mutant, strain 52145- $\Delta wca_{K2}$ .

958 C. % CD172<sup>+</sup> dendritic cells in baseline (0 h) and endpoint (4 h post treatment) in BAL  
959 samples and tissue from caudal lobe of mock-infected (PBS), and infected with *K.*  
960 *pneumoniae* 52.145 (Kp52145) and the isogenic *cps* mutant, strain 52145- $\Delta wca_{K2}$ .

961 Percentage of CD11R3<sup>+</sup> macrophages positive for CD163 expression associated (GFP<sup>+</sup>) or  
962 not (GFP<sup>-</sup>) with *K. pneumoniae* 52.145 (black dots) and the isogenic *cps* mutant, strain  
963 52145- $\Delta wca_{K2}$  (white dots) harbouring plasmid pFPV25.1Cm in BAL (D) and tissue (E).

964 In all panels, values are represented as standard error of mean of three independent  
965 experiments; \*\*p< 0.001, \*p< 0.05 determined by unpaired t test.

966 **Figure 5: -*K. pneumoniae* induced inflammation in the porcine EVLP model.**

967 mRNA levels in lung tissues mock-infected (PBS), and infected with *K. pneumoniae* 52.145  
968 (Kp52145) and the isogenic *cps* mutant, strain 52145- $\Delta wca_{K2}$  ( $\Delta wca_{K2}$ ) assessed by RT-  
969 qPCR: A. interleukin (il)-6, B. *il-12*, C. *il-8*, D. *ifn- $\gamma$* , E. *nos2*, F. *stat-4*, G. *il-10*. Values are

970 presented as the mean  $\pm$  SEM of three independent experiments measured in duplicate.  
971 \*\*\*\*p<0.0001, \*\*\*p<0.001, \*\*p<0.01, \*p<0.05 for the indicated comparisons using one-way  
972 ANOVA with Bonferroni correction.

973 **Figure 6: *K. pneumoniae* drives macrophage polarisation in a STAT6-dependent**  
974 **manner.**

975 A. CD163 surface expression in PBS or Kp52145-infected pBMDMs by flow cytometry.  
976 Values are shown as standard error of mean of two independent experiments in duplicate. \*\*,  
977  $p < 0.01$  determined by unpaired Student's *t*-test.

978 B. Immunoblotting analysis of phosphorylation of STAT6 (PSTAT6) and tubulin in lysates  
979 of pBMDMs infected with Kp52145 for the indicated times or left uninfected (ni). Data is  
980 representative of three independent experiments.

981 C. *cd163* levels in pBMDMs non-infected (ni) or infected with Kp52145 pre-treated with  
982 STAT6 inhibitor (AS1517499, 50nM 2 h prior to infection) or DMSO vehicle control. Values  
983 are shown as standard error of mean of three independent experiments.

984 D. Arginase-1 levels in pBMDMs non-infected (ni) or infected with Kp52145 pre-treated  
985 with STAT6 inhibitor (AS 1517499, 50nM 2 h prior to infection) or DMSO vehicle control.  
986 Values are shown as standard error of mean of three independent experiments.

987 E. Immunoblotting analysis of phosphorylation of STAT6 (PSTAT6) and tubulin in lysates of  
988 pBMDMs infected with Kp52145 and the isogenic *cps* mutant, strain 52145- $\Delta wca_{K2}$  for the  
989 indicated times or left uninfected (ni). Data is representative of three independent  
990 experiments.

991 F. *cd163* levels in pBMDMs non-infected (ni) or infected with the *cps* mutant, strain 52145-  
992  $\Delta wca_{K2}$ , pre-treated with STAT6 inhibitor (AS1517499, 50nM 2 h prior to infection) or  
993 DMSO vehicle control. Values are shown as standard error of mean of three independent  
994 experiments in duplicate.

995 G. *arginase-1* levels in pBMDMs non-infected (ni) or infected with *cps* mutant, strain 52145-  
996  $\Delta wca_{K2}$ , pre-treated with STAT6 inhibitor (AS 1517499, 50nM 2 h prior to infection) or  
997 DMSO vehicle control. Values are shown as standard error of mean of three independent  
998 experiments in duplicate.

999 In panels C, and D, \*\*\* $p < 0.001$ , \*\* $p < 0.01$ , for the indicated comparisons using one-way  
1000 ANOVA with Bonferroni correction.

1001 **Figure 7: *K.pneumonia* induces *il-10* expression which is p38 and pERK-dependent.**

1002 A. *il-10* levels in pBMDMs non-infected (ni) or infected with Kp52145 pre-treated with  
1003 STAT6 inhibitor (AS 1517499, 50nM/ 2 h prior to infection) or DMSO vehicle control.  
1004 Values are shown as standard error of mean of three independent experiments.



1005 B. Immunoblotting analysis of phosphorylation of STAT3 (PSTAT3) and STAT3 in lysates  
1006 of pBMDMs infected with Kp52145 for the indicated times or left uninfected (ni). Data is  
1007 representative of three independent experiments.

1008 C. Immunoblotting analysis of phosphorylations of ERK (pERK), p38 (Pp38), and tubulin in  
1009 lysates of pBMDMs infected with Kp52145 for the indicated times or left uninfected (ni).  
1010 Data is representative of three independent experiments.

1011 D. *il-10* levels in pBMDMs non-infected (ni) or infected with Kp52145 pre-treated with p38  
1012 inhibitor (SB203580, Tocris, 10  $\mu$ g/mL, 2 h prior to infection ), ERK inhibitor (U0126, LC  
1013 laboratories, 20  $\mu$ g/mL, 2 h prior to infection) or DMSO vehicle control. Values are shown as  
1014 standard error of mean of three independent experiments.

1015 In panels A and D, \*\*\*\*p<0.0001, \*\*\*p<0.001, for the indicated comparisons using one-way  
1016 ANOVA with Bonferroni correction.

1017

## 1018 **SUPPLEMENTARY FIGURE LEGENDS**

### 1019 **Supplementary figure 1: Regions for sample selection from porcine EVLP lung.**

1020 Image identifying “cranial”, “middle” and “caudal” regions for tissue sample collection.

### 1021 **Supplementary figure 2: Innate cells recruitment in *K. pneumoniae*-infected EVLP 1022 porcine model.**

1023 Gating strategy and representative dot plots for flow cytometric analysis of A) CD11R3+  
1024 macrophages, B) Neutrophil staining using anti-pig granulocyte marker clone 6D10, C)  
1025 Analysis of CD11R3-CD172+ dendritic cells, Dot plots represent 0h (baseline) and 4h post-  
1026 infection or mock infection BAL samples and 4h tissue samples. D) Gating strategy to  
1027 identify differential expression of M2 marker CD163 on K.p infected macrophages  
1028 (CD11R3+GFP+CD163+) or K.p (-) macrophages (CD11R3+GFP-CD163+).

### 1029 **Supplementary figure 3: *K. pneumoniae* CPS mutant induces a M1 markers in 1030 pBMDMs.**

1031 *Stat4* and *nos2* levels in pBMDMs non-infected (ni) or infected with *cps* mutant, strain  
1032 52145- $\Delta wca_{K2}$ , pre-treated with STAT6 inhibitor (AS1517499, 50nM 2 h prior to infection)  
1033 or DMSO vehicle control. Values are shown as standard error of mean of three independent  
1034 experiments in duplicate. \*\*\*\*p<0.0001, \*\*p<0.01, n.s. p>0.05 for the indicated comparisons  
1035 using one-way ANOVA with Bonferroni correction.



**A**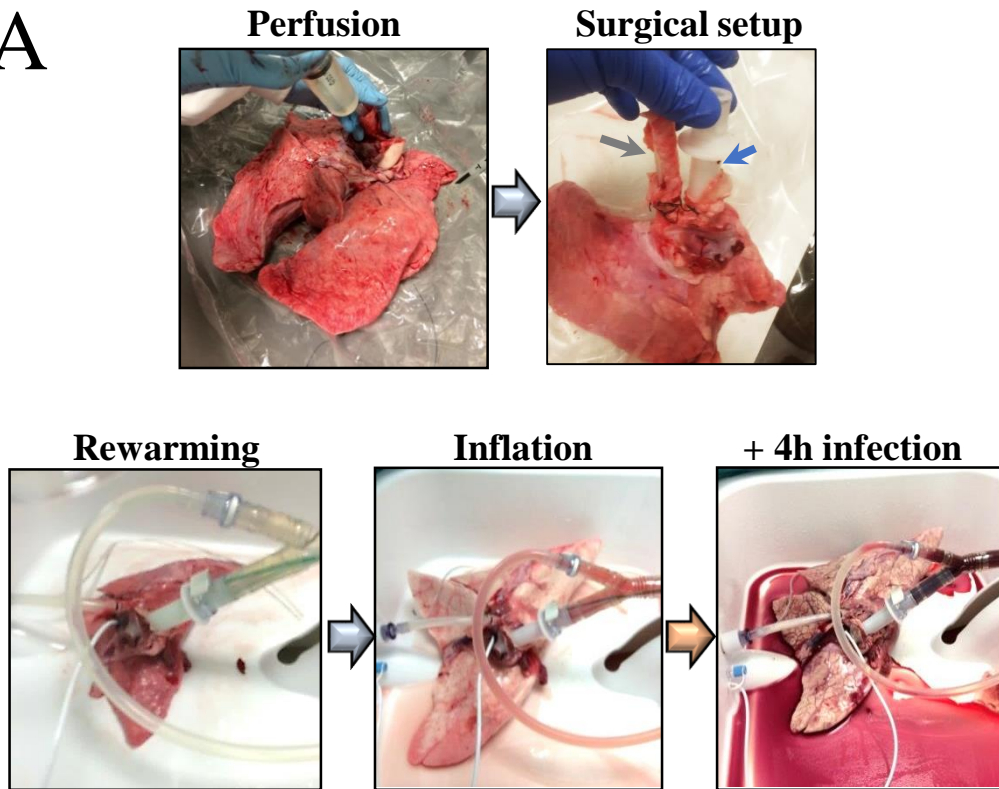**B**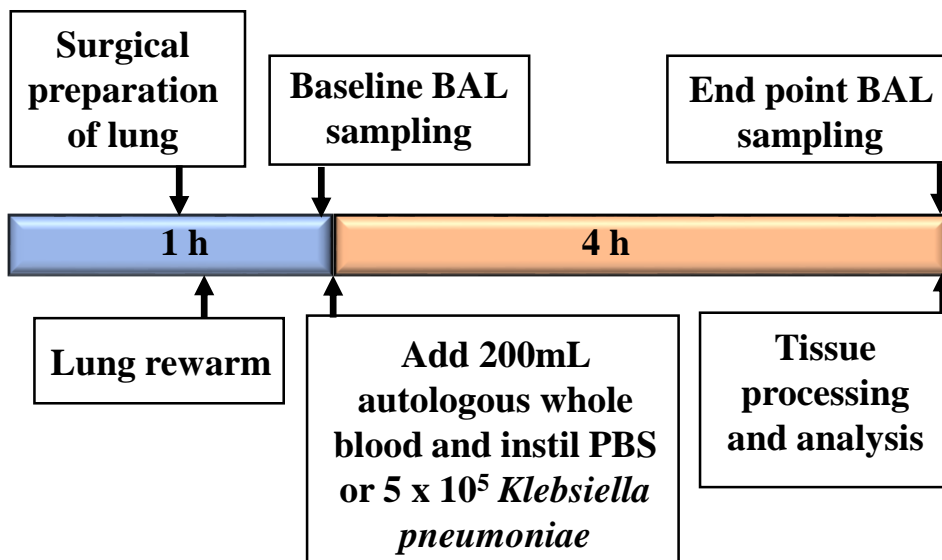

**A**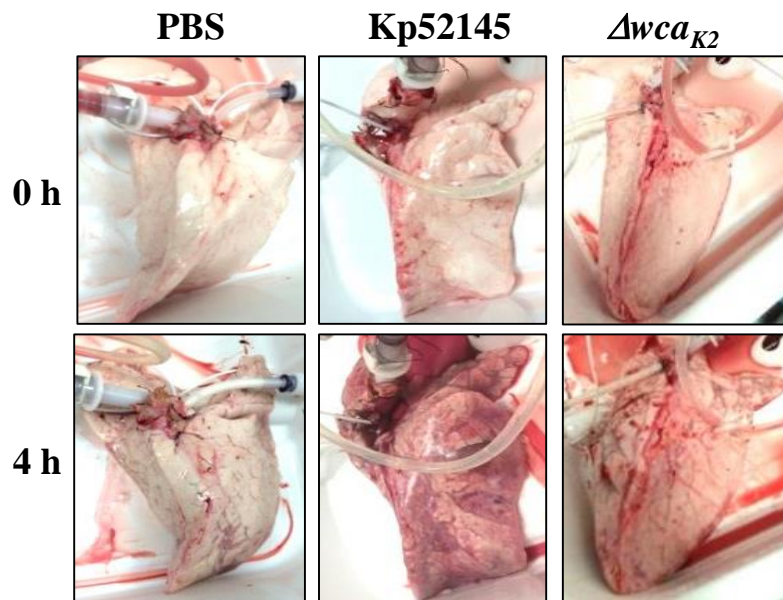**B**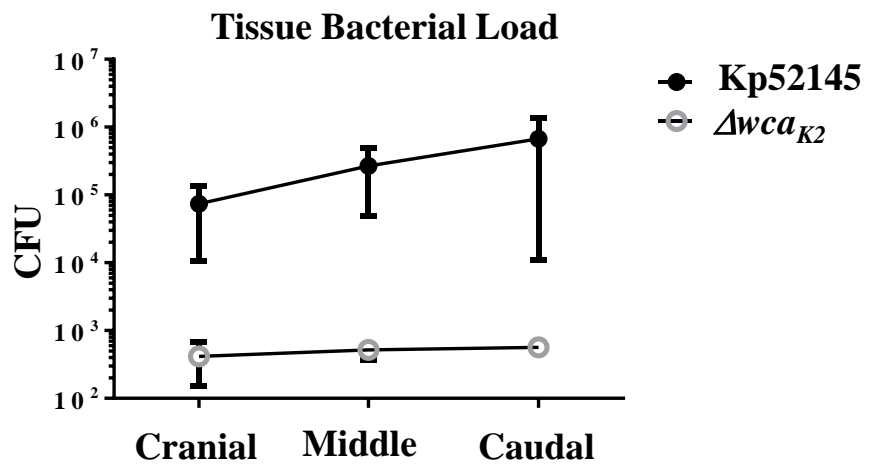

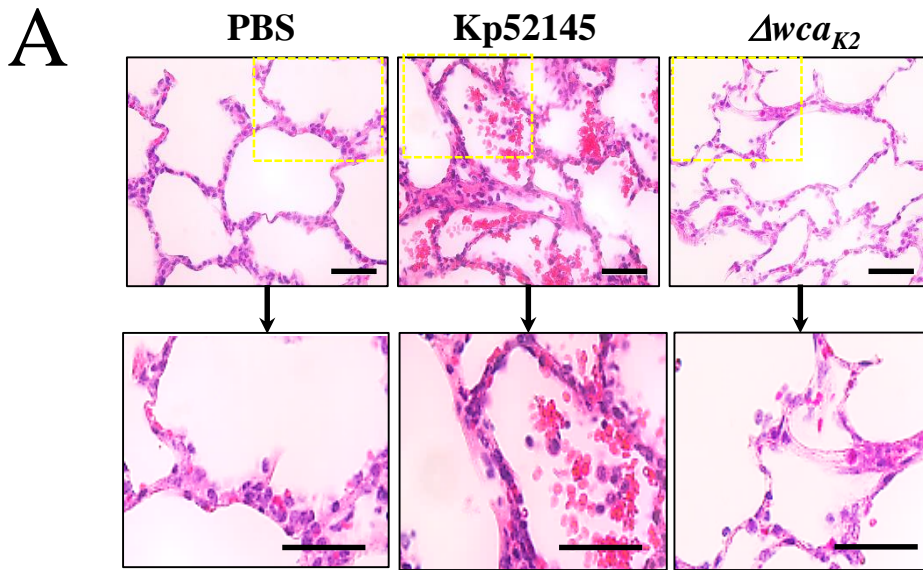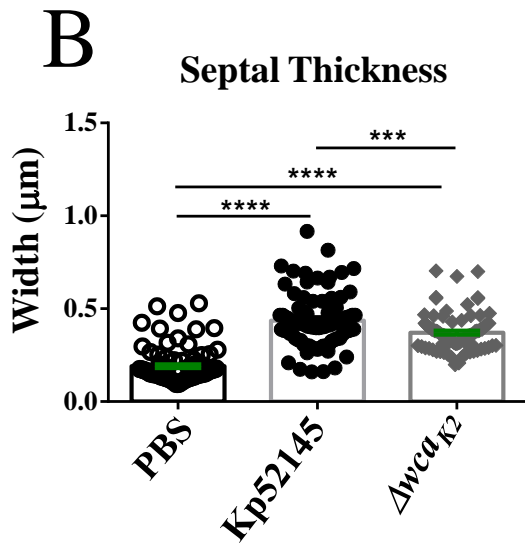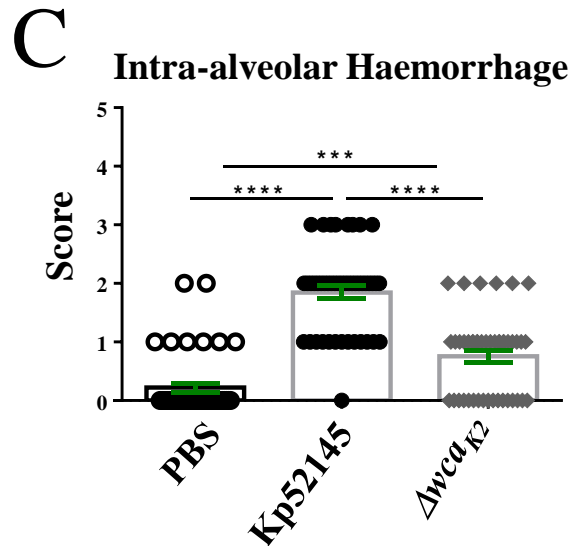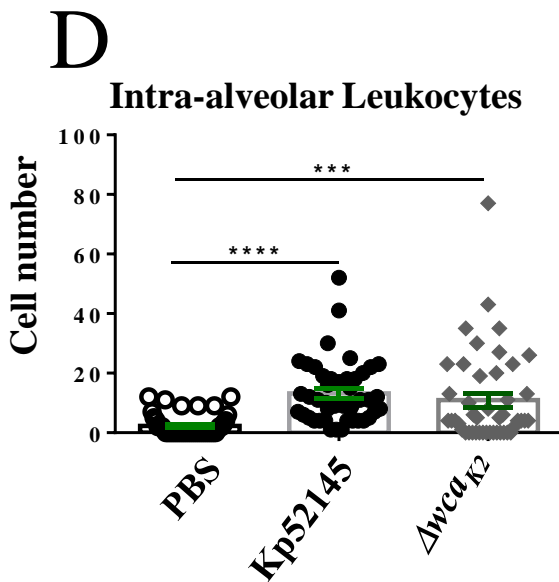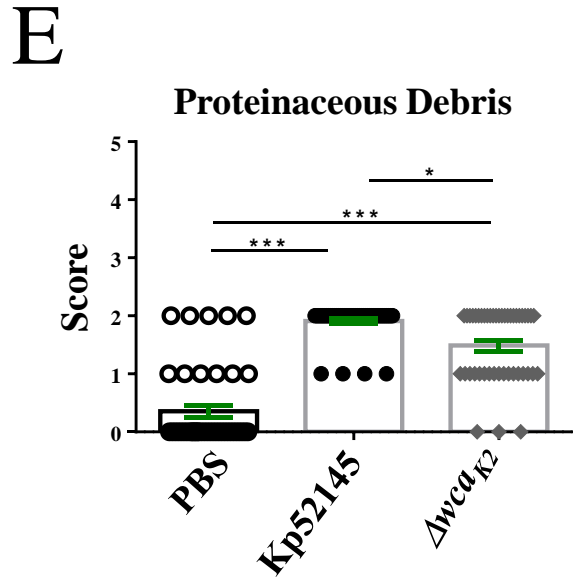

# F

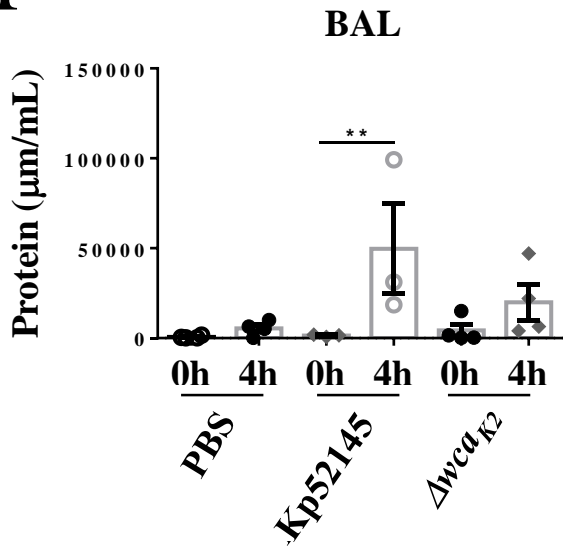

**A****Macrophages**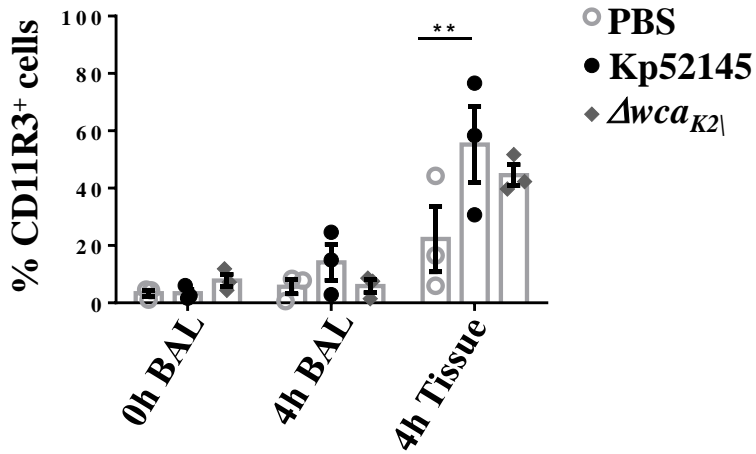**B****Neutrophils**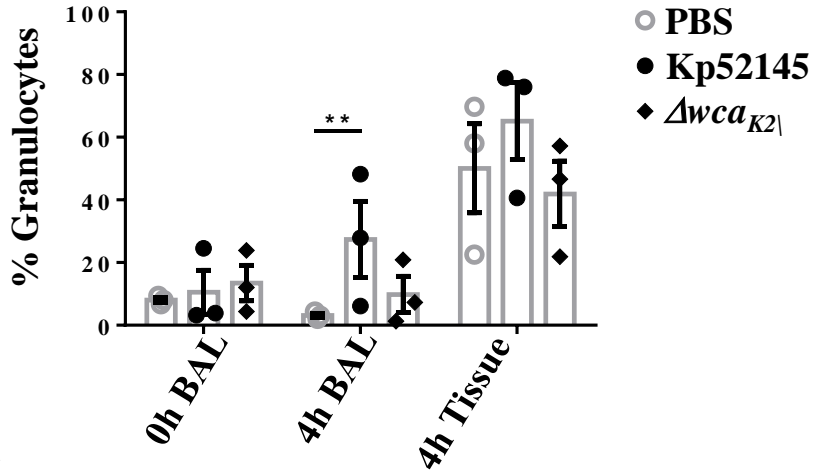**C****Dendritic Cells**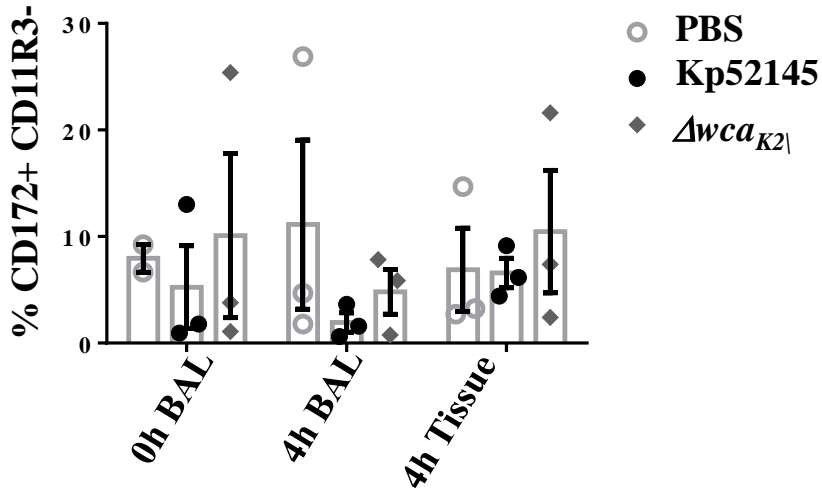

**D**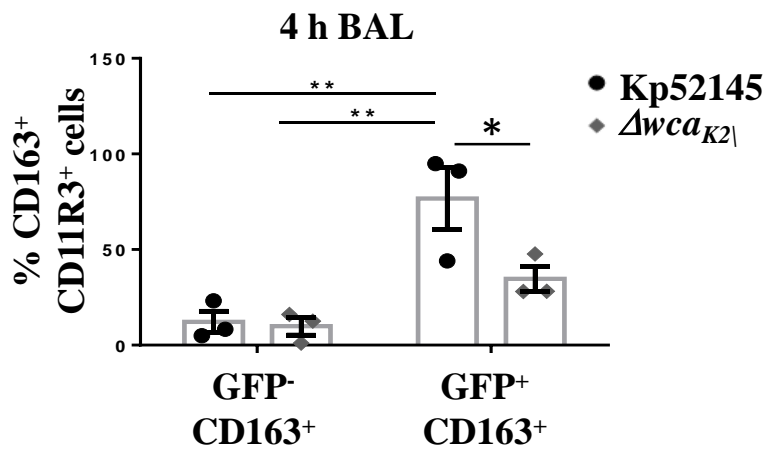**E**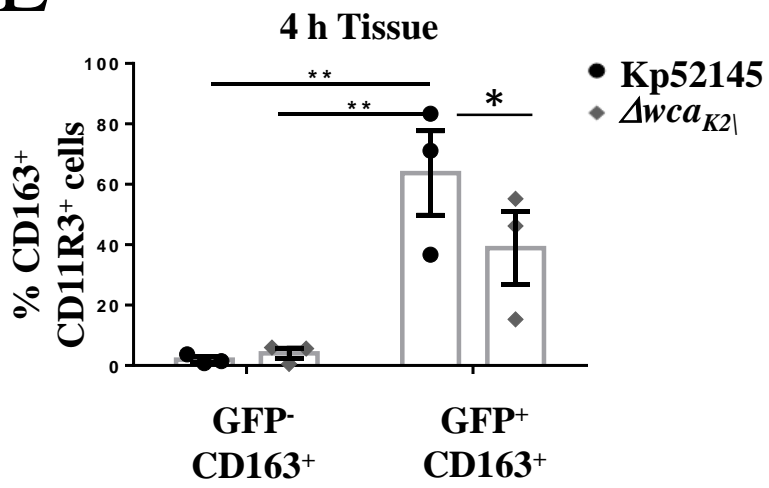



**A**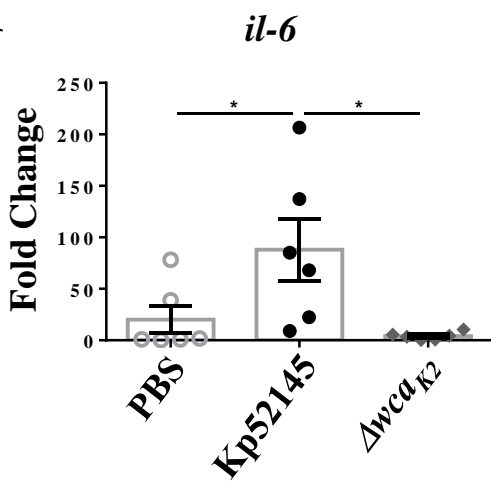**B**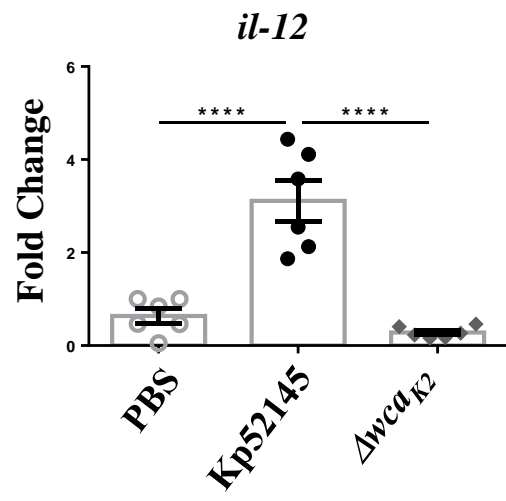**C**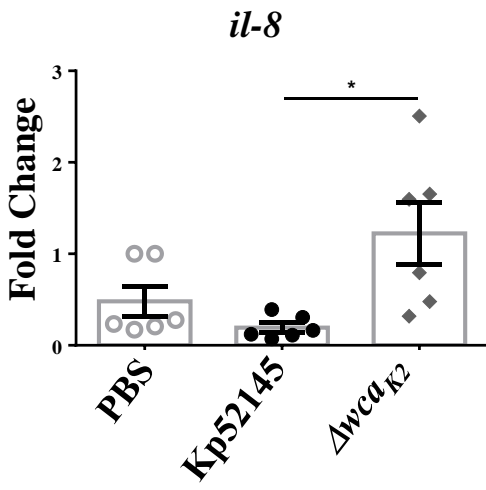**D**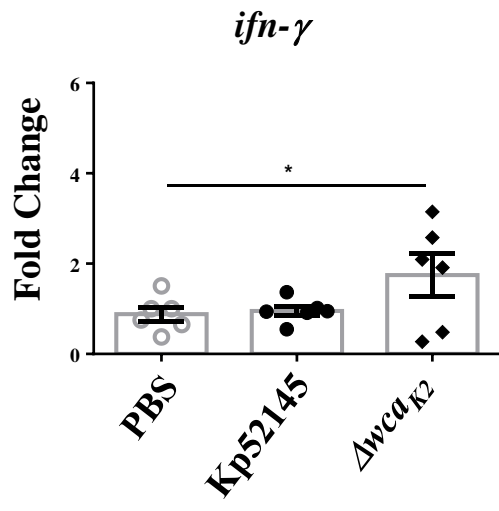**E**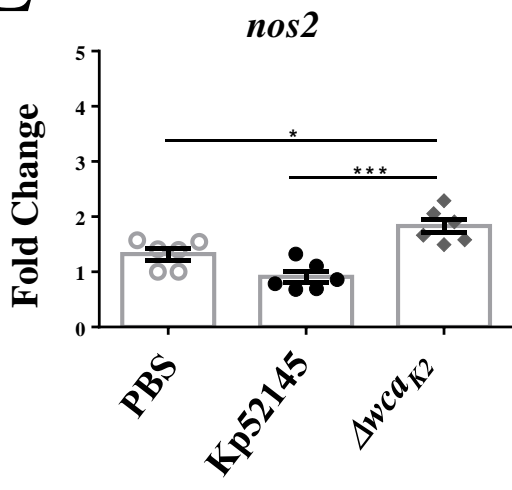**F**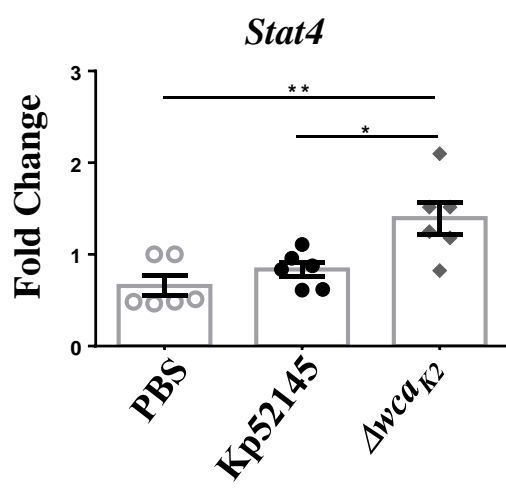

# G

*Il-10*

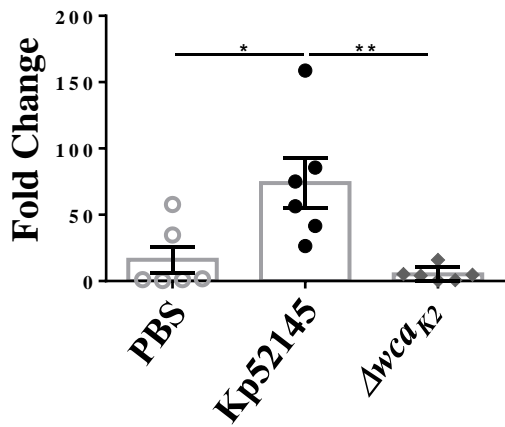

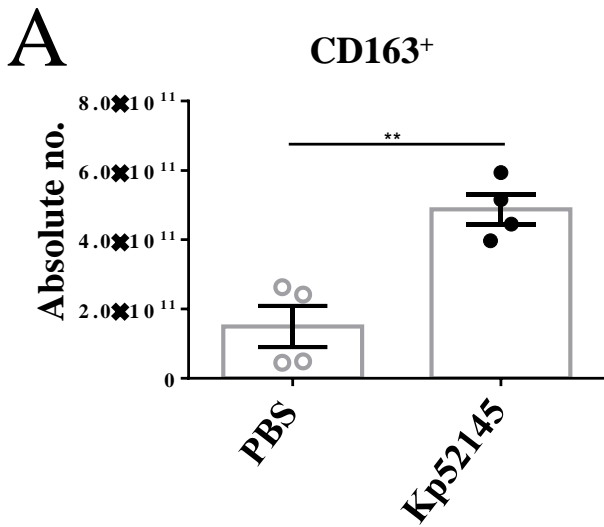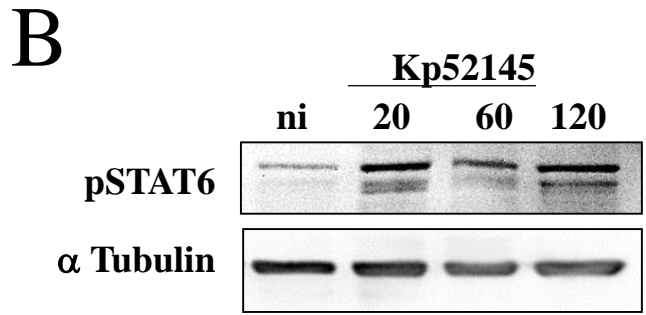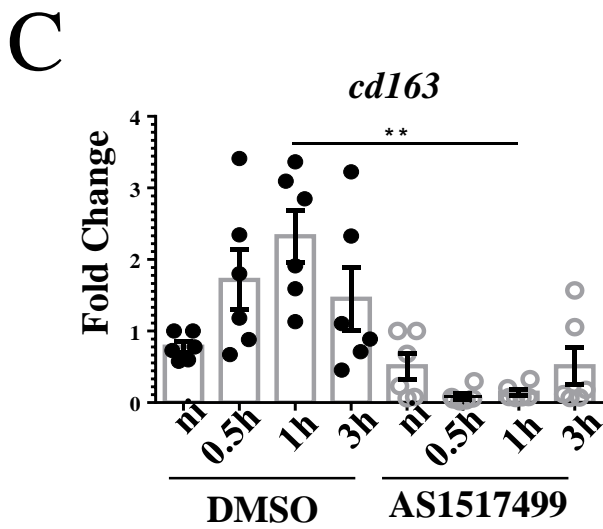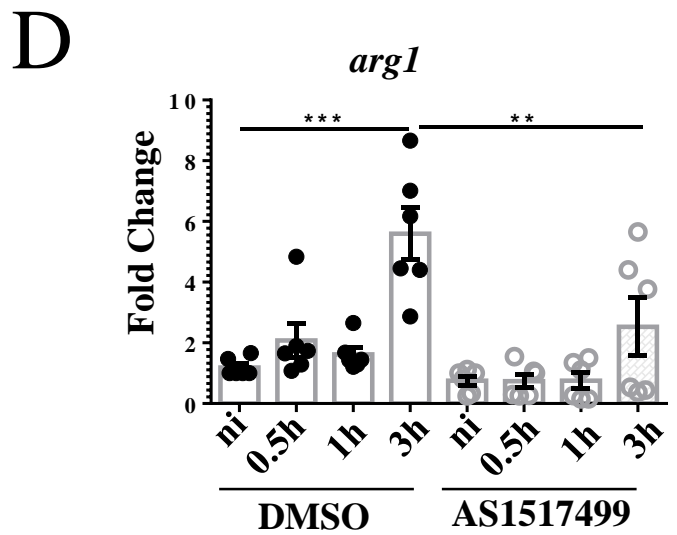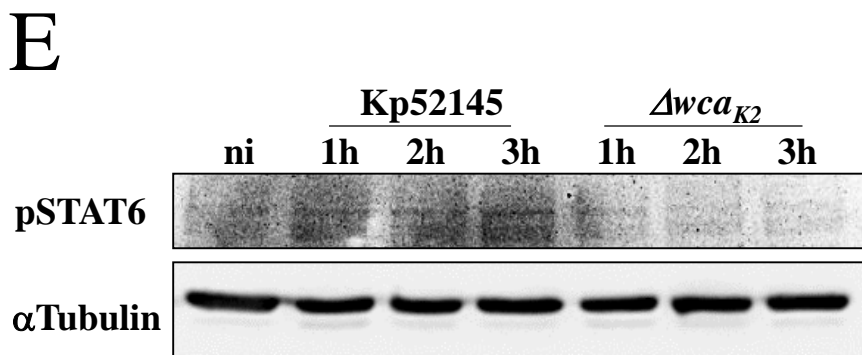

**F** $\Delta wca_{K2}$  *arg1*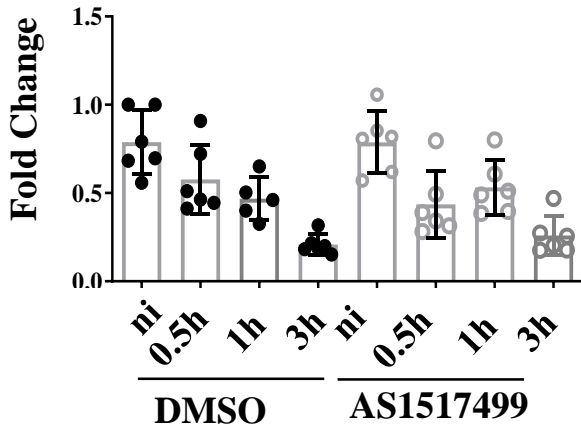**G** $\Delta wca_{K2}$  *cd163*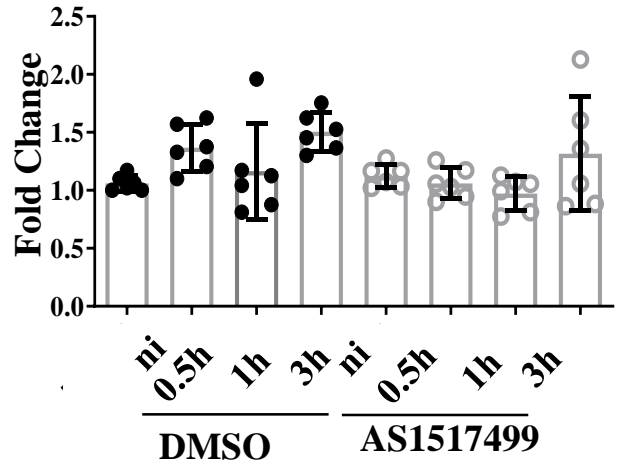

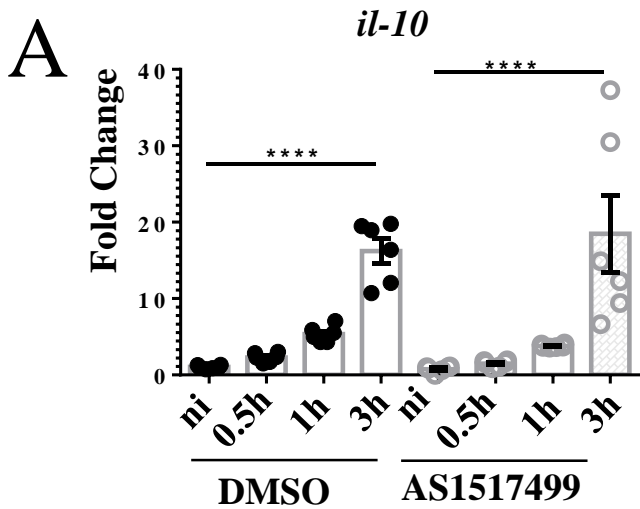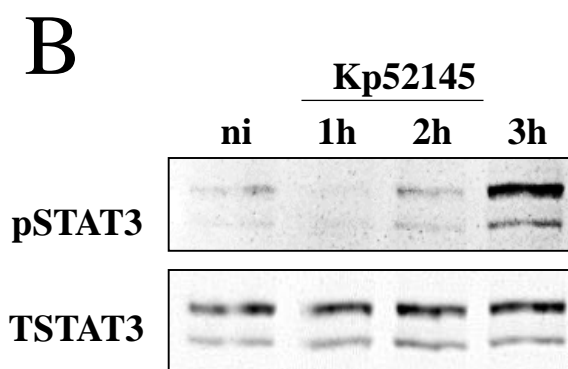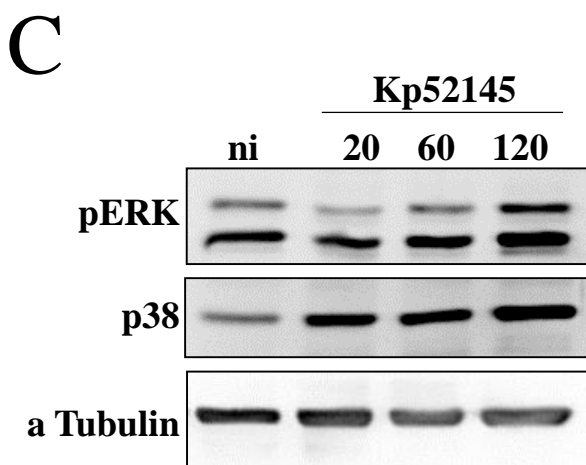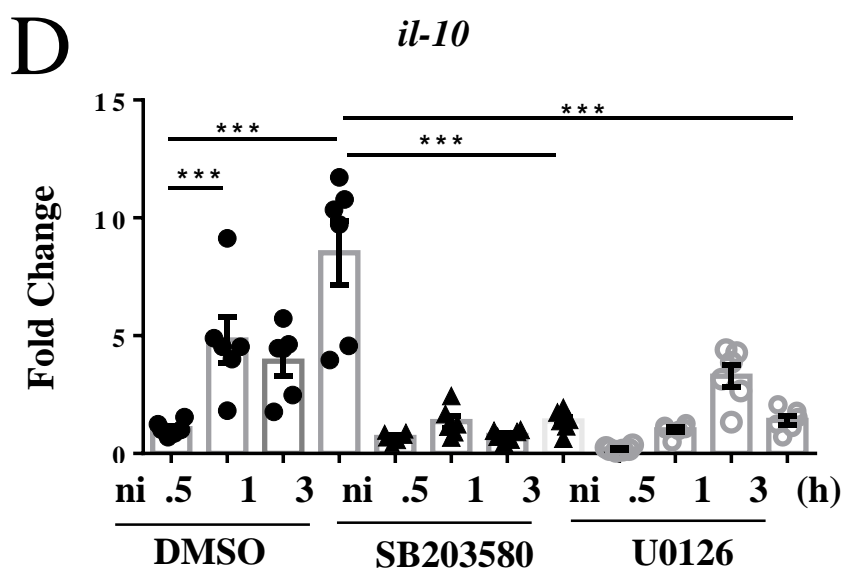

Source: https://www.biorxiv.org/content/10.1101/708503v1.full.pdf
